# Supplementary material for: New aminotetrazole derivatives as hydrogen bonding catalysts. A green and selective oxidation of organosulphides with H2O2in H2O
Source: Royal Society of Chemistry journal article supplement (doi:10.1039/c4nj00530a), 2014-05-16

## Supporting Information

# New Aminotetrazole Derivatives as Hydrogen Bonding Catalysts. A Green and Selective Oxidation of Organosulphides with H<sub>2</sub>O<sub>2</sub> in H<sub>2</sub>O

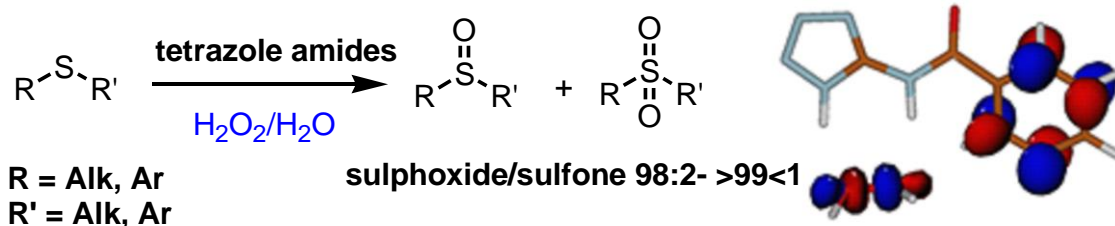

Francesco Secci\*, Massimiliano Arca, Angelo Frongia, Pier Paolo Piras

*Dipartimento di Scienze Chimiche e Geologiche, Università degli studi di Cagliari, Complesso Universitario di Monserrato, S.S. 554, Bivio per Sestu, I-09042, Monserrato, Cagliari, ITALY e-mail: [fsecci@unica.it](mailto:fsecci@unica.it), phone number (+39) 0706754384*

|                                                                                                |     |
|------------------------------------------------------------------------------------------------|-----|
| 1. <b>Synthesis</b> .....                                                                      | S2  |
| 1.1 General methods.....                                                                       | S2  |
| 1.2 General procedure for the oxidation of sulphides <b>5a-p</b> to sulphoxides <b>6a-6p</b> . | S2  |
| 1.3 Synthesis of aminotetrazole-thiourea ligands <b>9a-c</b> .....                             | S3  |
| 1.4 General procedure for the oxidation of sulphide <b>5a</b> using ligands <b>9ac</b> .....   | S4  |
| 1.5 Catalyst recovery procedure.....                                                           | S5  |
| 2. <b>Spectroscopic NMR data</b> .....                                                         | S6  |
| 2.1 <sup>1</sup> H and <sup>13</sup> C NMR spectra data of compound <b>6a-p</b> .....          | S6  |
| 2.2 <sup>1</sup> H and <sup>13</sup> C NMR spectra of ligands <b>9a-c</b> .....                | S21 |

## 1. Synthesis

### 1.1 General methods

<sup>1</sup>H NMR spectra were recorded on 400 and 500 MHz Varian spectrometers at 27°C using CDCl<sub>3</sub>, DMF-*d*<sub>7</sub> or DMSO-*d*<sub>6</sub> as solvent. <sup>13</sup>C NMR were recorded at 100 and 125 MHz at 27°C using CDCl<sub>3</sub>, DMF-*d*<sub>7</sub> or DMSO-*d*<sub>6</sub> as solvent. Chemical shifts (δ) are given in ppm. Coupling constants (*J*) are reported in Hz. Infrared spectra were recorded on a FT-IR Bruker spectrophotometer and are reported in wavenumbers. Low Mass spectra analysis were recorded on an Agilent-HP GC-MS (E.I. 70eV).

Analytical thin layer chromatography was performed using 0.25 mm silica gel 60-F plates. Flash chromatography was performed using 70-200 mesh silica gel. Yields refer to chromatography and spectroscopically pure materials.

### 1.2 General procedure for the oxidation of sulphides **5a-p** to sulphoxides **6a-6p** using cat. **1a**-H<sub>2</sub>O<sub>2</sub>

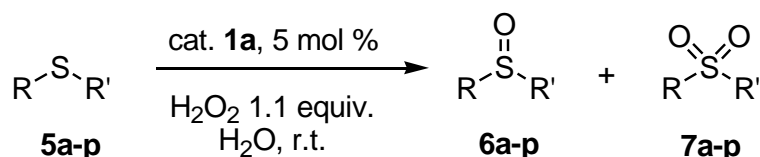

To a 3 M solution of sulphide **5a** (100 mg, 0.8 mmol) and tetrazole **1a** (5 mol. %) in water (2.7 mL), H<sub>2</sub>O<sub>2</sub> (30% v/v in water, 1.1 equiv.) was added in one injection and the resulting mixture was stirred at room temperature and followed by Gc-MS until completion (**6a/7a** ratio 98:2). The reaction mixture was filtered and the water solution was extracted with. The organic phase was dried on Na<sub>2</sub>SO<sub>4</sub>, filtered and concentrated under reduced pressure. The catalyst was recovered by washing up the filtered solid with Ethyl acetate and dried. Pure sulphoxide **6a** was obtained after flash column chromatography (silica gel, 80:20 hexane/ether) in 92% yield. Colorless oil. <sup>1</sup>H NMR (500 MHz, CDCl<sub>3</sub>) δ: 7.62-7.60 (m, 2 H), 7.48-7.46 (m, 3 H), 2.68 (s, 3 H); <sup>13</sup>C NMR (125 MHz, CDCl<sub>3</sub>) δ: 145.6, 130.8, 129.2, 123.3, 43.8. Ms *m/z*: (M+140, (100%), 125 (98%), 97 (60%), 77 (50%), 51 (35%).

### 1.3 Synthesis of aminotetrazole-thiourea ligands 9a-c

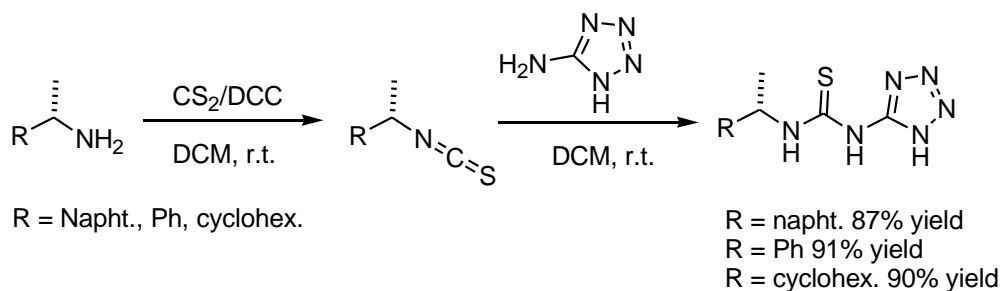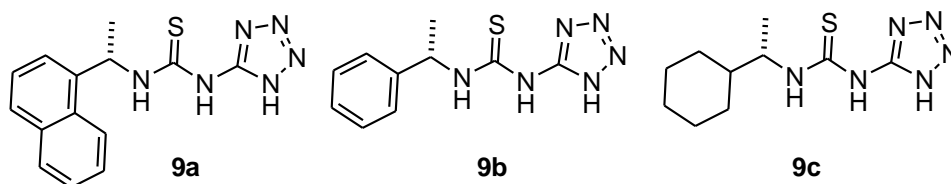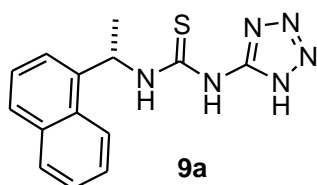

**Synthesis of catalyst 9a.** To a stirred solution of CS<sub>2</sub> (2.22 mL) and DCC (1.20g, 5.84 mmol) at -10°C, in dry Et<sub>2</sub>O, (5 mL), (*S*)- 1-Naphthalen-2-yl-ethylamine (1.0g, 5.84 mmol), in Et<sub>2</sub>O (3 mL), was added dropwise. After 1 hour the reaction mixture was warmed to room temperature and stirred for additional 12 hours. The reaction mixture was filtered and the resulting solid was washed with Et<sub>2</sub>O. The organic phase was passed through a pad of silica, washed with hexane and concentrated under reduced pressure to afford the isothiocyanate intermediate as a colorless liquid which was used in the next step without further manipulations. Isothiocyanate was diluted in DCM (20 mL) and aminotetrazole-1H<sub>2</sub>O (0.381g, 3.70 mmol) was added at room temperature. The resulting suspension was stirred for 48 h and concentrated under reduced pressure. The crude solid was chromatographed using EtOAc/EtOH 3:1 to afford compound **9a** as a white solid in 87% yield (1.51g). Mp = 108-112°C, [α]<sup>21°C</sup><sub>D</sub> = -107.46 (*c.* 1.488 in MeOH). <sup>1</sup>H NMR (500 MHz, DMSO-*d*<sub>6</sub>) δ: 8.12 (d, 1 H, *J* = 8.5Hz), 7.99 (d, 1 H, *J* = 8.0Hz), 7.94 (d, 1H, *J* = 8.5Hz), 6.45 (br.s, 2H), 6.05 (q, 1H, *J* = 6.5Hz), 1.77 (d, 3 H, *J* = 6.5Hz); <sup>13</sup>C NMR (125 MHz, DMSO-*d*<sub>6</sub>) δ: 156.3, 135.3, 133.3, 130.1, 129.1, 128.7, 128.6, 126.6, 125.9, 125.4, 122.9, 122.6, 110.5, 53.3, 22.9.

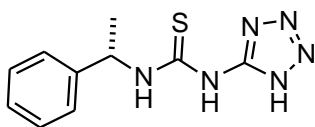

**9b**

**Synthesis of catalyst 9b.** To a stirred solution of CS<sub>2</sub> (3.13 mL) and DCC (1.69g, 8.26 mmol) at -10°C, in dry Et<sub>2</sub>O, (5 mL), (*S*)- 1-1-Phenyl-ethylamine (1.0g, 8.26 mmol), in Et<sub>2</sub>O (5 mL), was added dropwise. After 1 hour the reaction mixture was warmed to room temperature and stirred for additional 12 hours. The reaction mixture was filtered and the resulting solid was washed with Et<sub>2</sub>O. The organic phase was passed through a pad of silica, washed with hexane and concentrated under reduced pressure to afford the isothiocyanate intermediate as a colorless liquid which was used in the next step without further manipulations. Isothiocyanate was diluted in DCM (35 mL) and aminotetrazole-1H<sub>2</sub>O (0.851g, 8.25 mmol) was added at room temperature. The resulting suspension was stirred for 48 h and concentrated under reduced pressure. The crude solid was chromatographed using EtOAc/EtOH 3:1 to afford compound **9b** as a white solid in 91% yield (1.85g). Mp = 53-55°C, [α]<sup>21°C</sup><sub>D</sub> = -7.03 (c. 2.274 in MeOH). <sup>1</sup>H NMR (500 MHz, DMF-*d*<sub>7</sub>) δ: 7.62-7.60 (m, 2 H), 7.62-7.59 (m, 4 H), 7.55-7.52 (m, 1 H), 6.67 (br.s, 2H), 5.42 (q, 1H, *J* = 6.5Hz), 3.65 (br.s, 1H), 1.83 (d, 3H, *J* = 6.5Hz); <sup>13</sup>C NMR (125 MHz, DMF-*d*<sub>7</sub>) δ: 158.7, 142.0, 132.4, 130.3, 129.8, 129.6, 127.7, 127.1, 58.3, 25.3

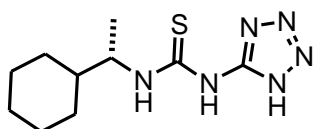

**9c**

**Synthesis of catalyst 9c.** To a stirred solution of CS<sub>2</sub> (3.13 mL) and DCC (1.69g, 8.26 mmol) at -10°C, in dry Et<sub>2</sub>O, (5 mL), (*S*)- 1-1-cyclohexyl-ethylamine (1.05g, 8.26 mmol), in Et<sub>2</sub>O (5 mL), was added dropwise. After 1 hour the reaction mixture was warmed to room temperature and stirred for additional 12 hours. The reaction mixture was filtered and the resulting solid was washed with Et<sub>2</sub>O. The organic phase was passed through a pad of silica, washed with hexane and concentrated under reduced pressure to afford the isothiocyanate intermediate as a colorless liquid which was used in the next step without further manipulations. Isothiocyanate was diluted in DCM (35 mL) and aminotetrazole-1H<sub>2</sub>O (0.851g, 8.25 mmol) was added at room temperature. The resulting

suspension was stirred for 48 h and concentrated under reduced pressure. The crude solid was chromatographed using EtOAc/EtOH 3:1 to afford compound **9c** as a white solid in 90% yield (1.88g). Mp = 68-70°C,  $[\alpha]_{\text{D}}^{22} = +31.83$  (c. 2.764 in DMSO).  $^1\text{H NMR}$  (500 MHz, DMSO- $d_6$ )  $\delta$ : 6.40 (br.s., 2 H), 3.75 (quint, 1 H,  $J = 6.5\text{Hz}$ ), 1.76-1.67 (m, 3 H), 1.63-1.58 (m, 2H), 1.45-1.38 (m, 1H), 1.24 (d, 3H,  $J = 6.5\text{Hz}$ ), 1.22-1.14 (m, 2H), 1.11-1.03 (m, 1H), 1.00 (dd, 1H,  $J = 3.0\text{Hz}$ ,  $J = 14.0\text{Hz}$ ), 0.95 (dd, 1H,  $J = 2.5\text{Hz}$ ,  $J = 12.0\text{Hz}$ );  $^{13}\text{C NMR}$  (125 MHz, DMSO- $d_6$ )  $\delta$ : 156.6, 128.2, 58.5, 42.9, 29.0, 27.5, 25.7, 25.4, 25.3, 18.5.

#### 1.4 General procedure for the oxidation of sulphide **5a** using catalysts **9a-c**/ $\text{H}_2\text{O}_2$ .

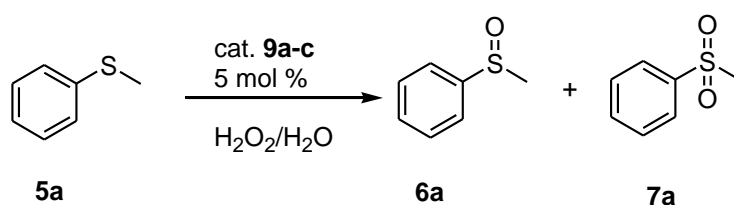

**Method A (room temperature oxidation)** To a 3 M solution of sulphide **5a** (100 mg, 0.8 mmol) and tetrazole thiourea **9a** (5 mol. %) in water (2.7 mL),  $\text{H}_2\text{O}_2$  (30% v/v in water, 1.1 equiv.) was added in one injection and the resulting mixture was stirred at room temperature and followed by Gc-Ms until completion (**6a/7a** ratio  $>99<1$ ). The reaction mixture was filtered and the water solution was extracted with. The organic phase was dried on  $\text{Na}_2\text{SO}_4$ , filtered and concentrated under reduced pressure. The catalyst was recovered by washing up the filtered solid with Ethyl acetate and dried. Pure sulphoxide **6a** was obtained after flash column chromatography (silica gel, 80:20 hexane/ether) in 92% yield. Colorless oil. HPLC chiral column: Phenomenex IPA/Hex 90:10, 1.0 mL/min,  $\lambda = 254\text{ nm}$ ,  $R_t = 14.10$ ,  $R_t = 18.33$  (e.r. 49:51).

**Method B (0°C oxidation)** To a 3 M solution of sulphide **5a** (100 mg, 0.8 mmol) and tetrazole thiourea **9a** (5 mol. %) in water (2.7 mL),  $\text{H}_2\text{O}_2$  (30% v/v in water, 1.1 equiv.) was added in one injection and the resulting mixture was stirred at room temperature and followed by Gc-Ms until completion (**6a/7a** ratio  $>99<1$ ). The reaction mixture was filtered and the water

solution was extracted with. The organic phase was dried on Na<sub>2</sub>SO<sub>4</sub>, filtered and concentrated under reduced pressure. The catalyst was recovered by washing up the filtered solid with Ethyl acetate and dried. Pure sulphoxide **6a** was obtained after flash column chromatography (silica gel, 80:20 hexane/ether) in 90% yield. Colorless oil. Colorless oil. HPLC chiral column: Phenomenex IPA/Hex 90:10, 1.0 mL/min,  $\lambda = 254$  nm, Rt = 14.10, Rt = 18.33 (e.r. 48:52).

## 1.5 Catalyst recovery procedure

To value the catalyst recovery, we carried out a set of experiments as reported:

- 1) 150 mg of cat. **2a** were loaded for the oxidation of 2 g of sulphide **5a**. At completion, the reaction mixture was filtered and washed with EtOAc (2 x 30 mL). Cat. **2a** was collected and dried under reduced pressure for 12h at room temperature. The catalyst recovery % was determined by weighting of the dried white solid. (132 mg of catalyst, 88% recovered).
- 2) 130 mg of cat. **2a** were loaded for the oxidation of 1.73 g of sulphide **5a**. After filtration and drying, the catalyst recovery % was determined by weighting of the dried white solid. (113 mg of catalyst, 87% recovered).
- 3) 100 mg of cat. **2a** were loaded for the oxidation of 1.33 g of sulphide **5a**. After filtration and drying, the catalyst recovery % was determined by weighting of the dried white solid. (76 mg of catalyst, 76% recovered).

# $^1\text{H}$ and $^{13}\text{C}$ NMR spectra of compound 6a-p

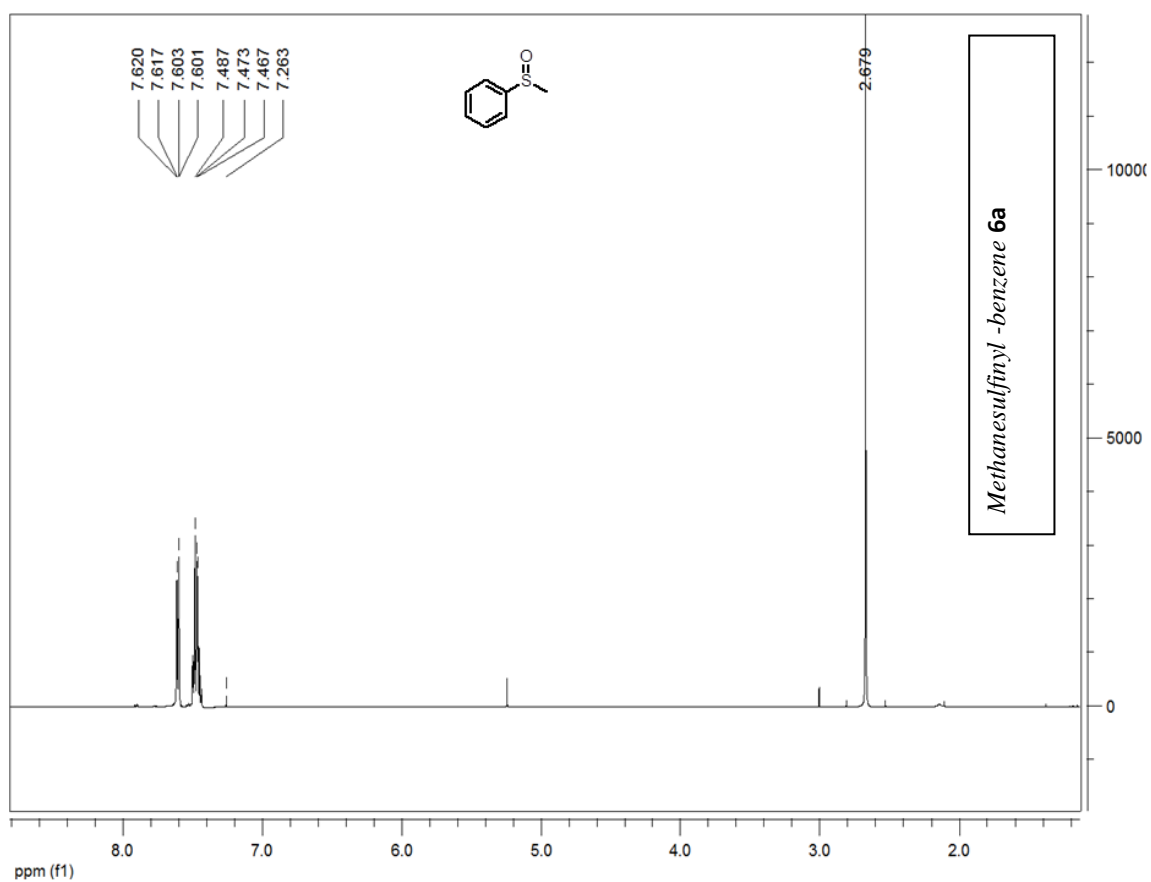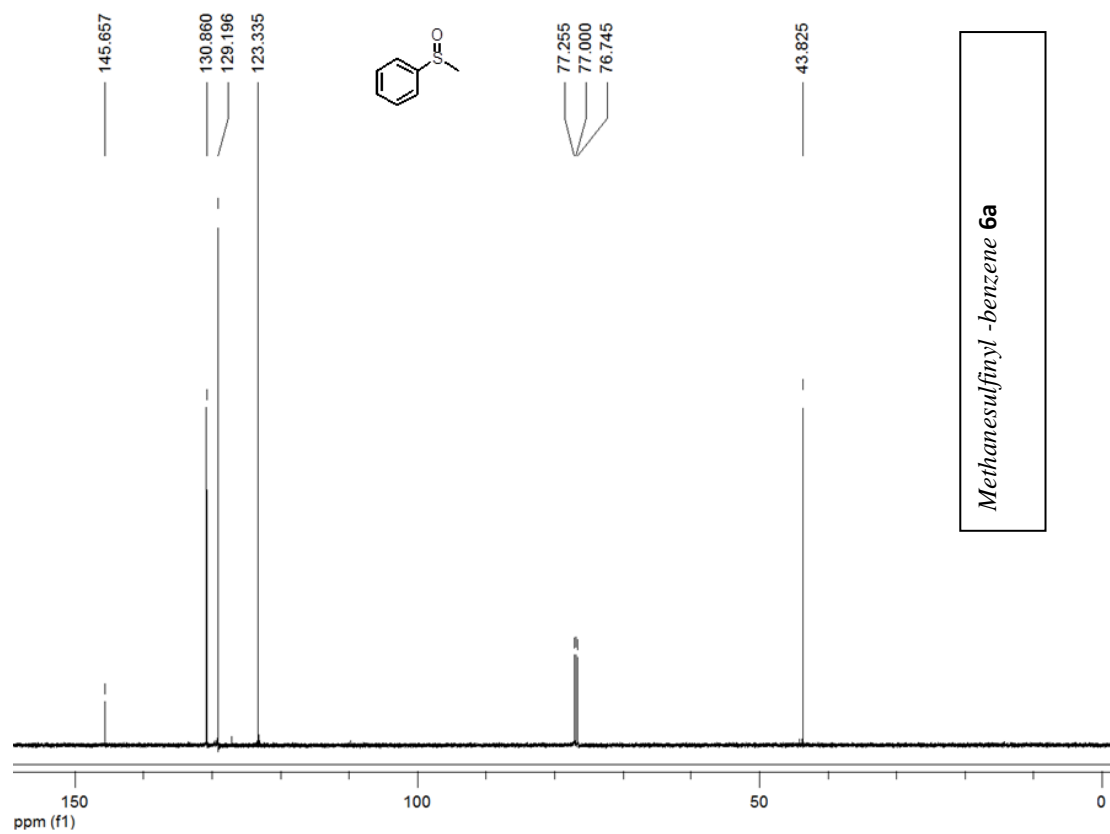

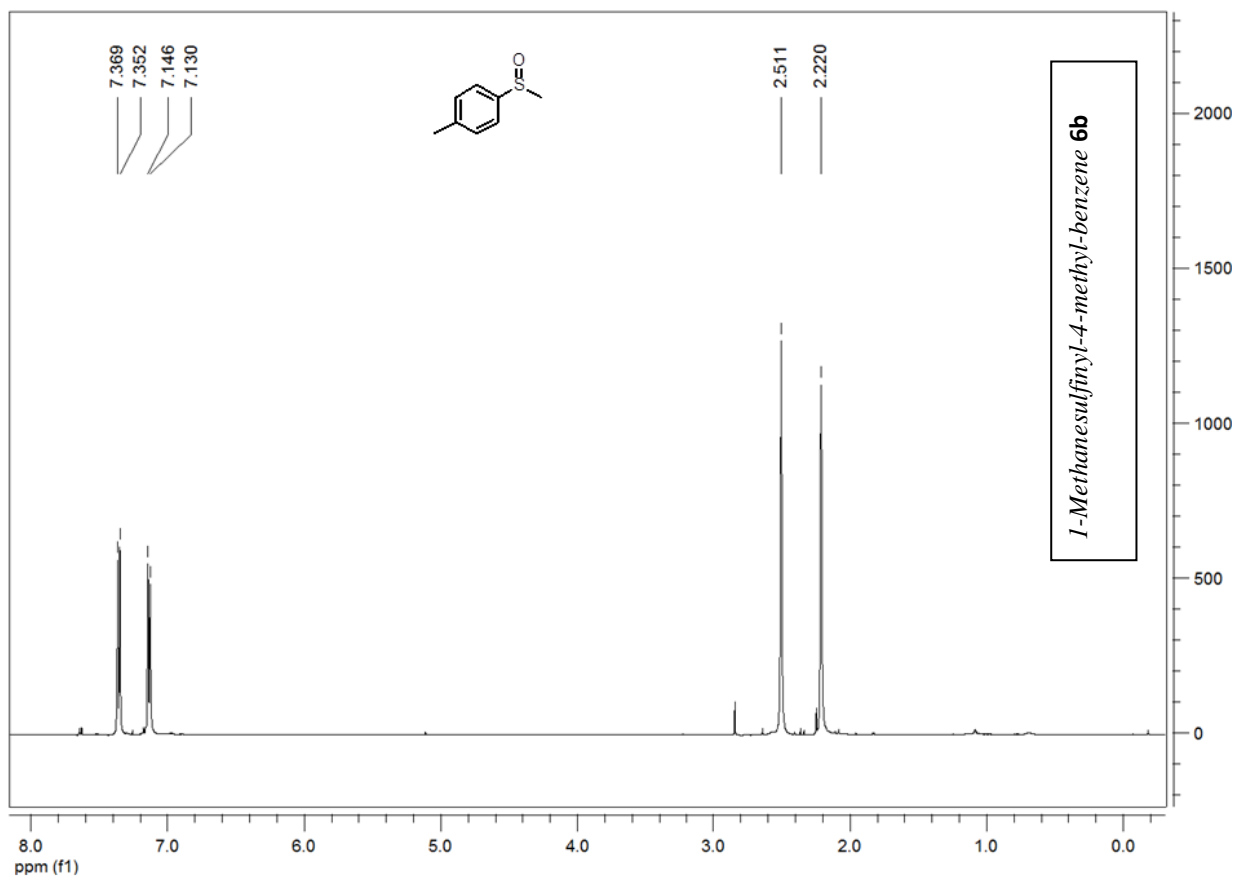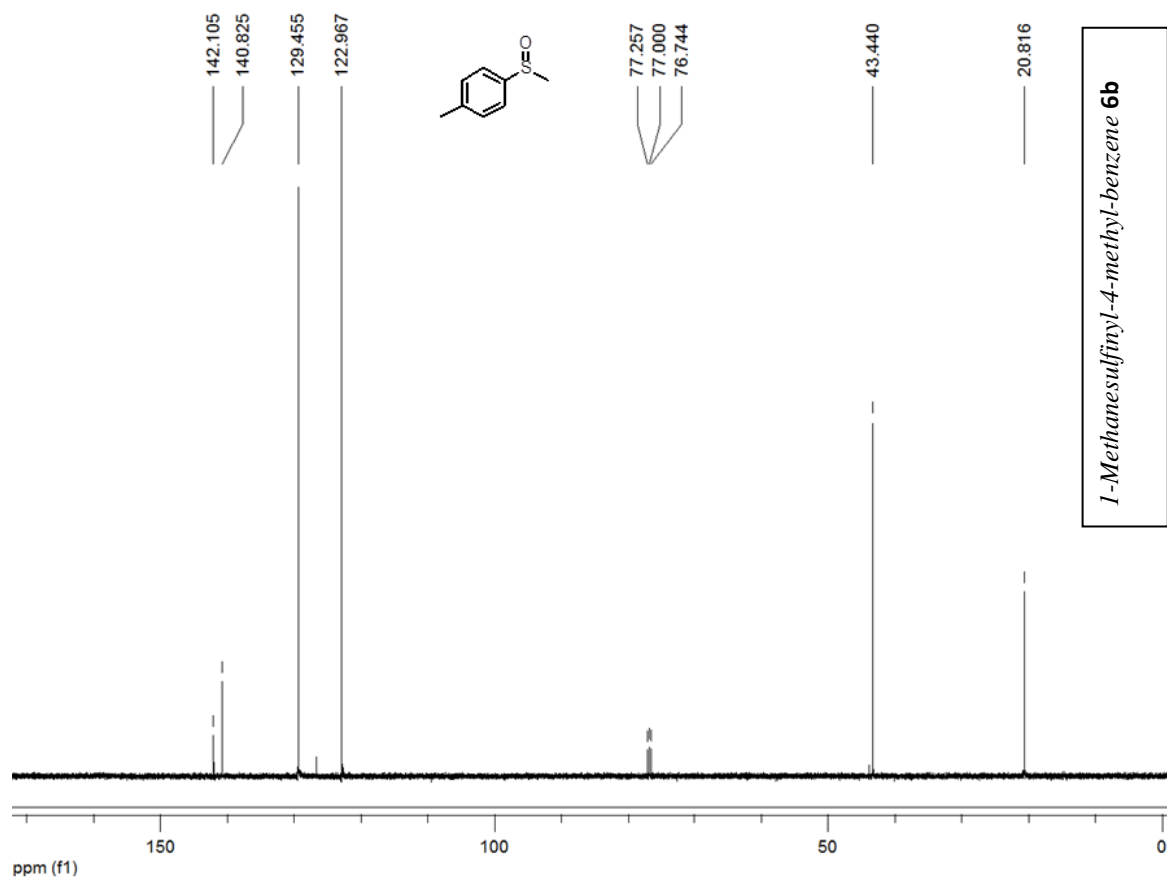



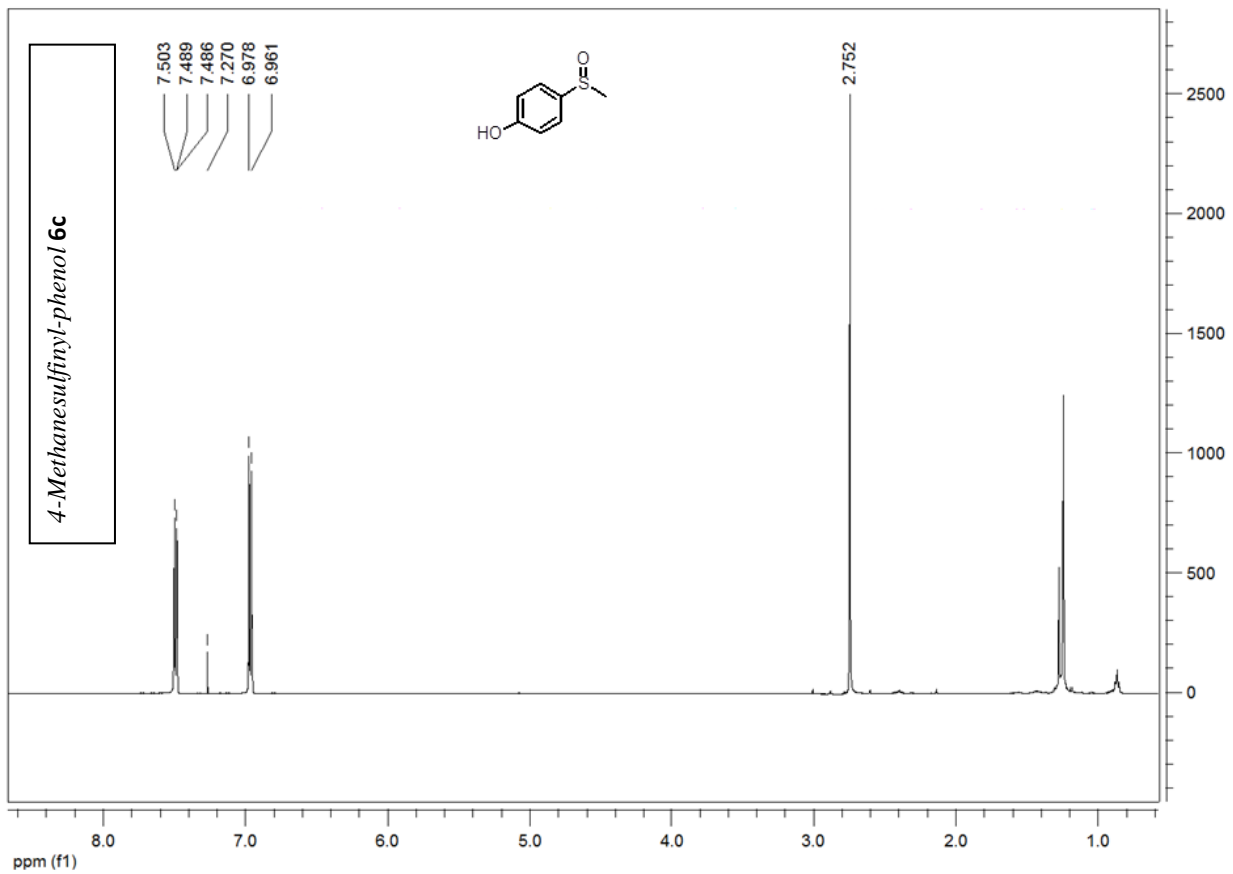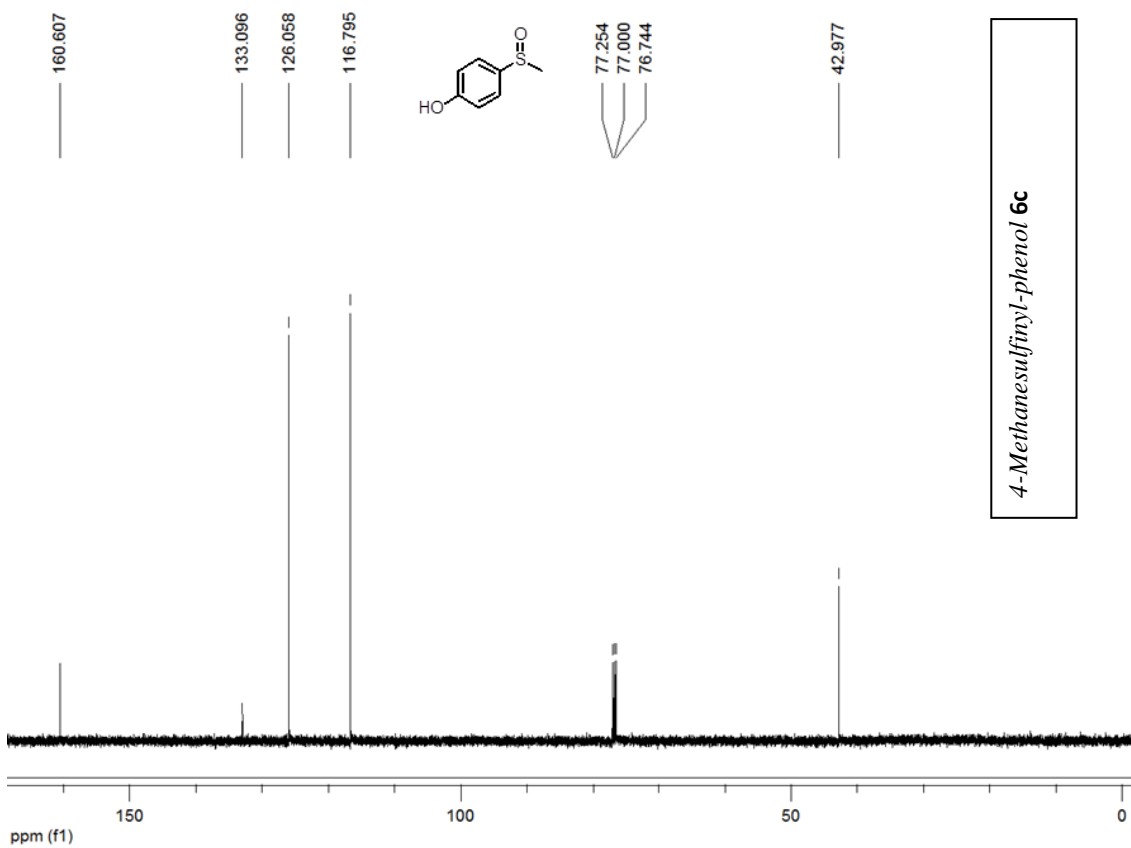

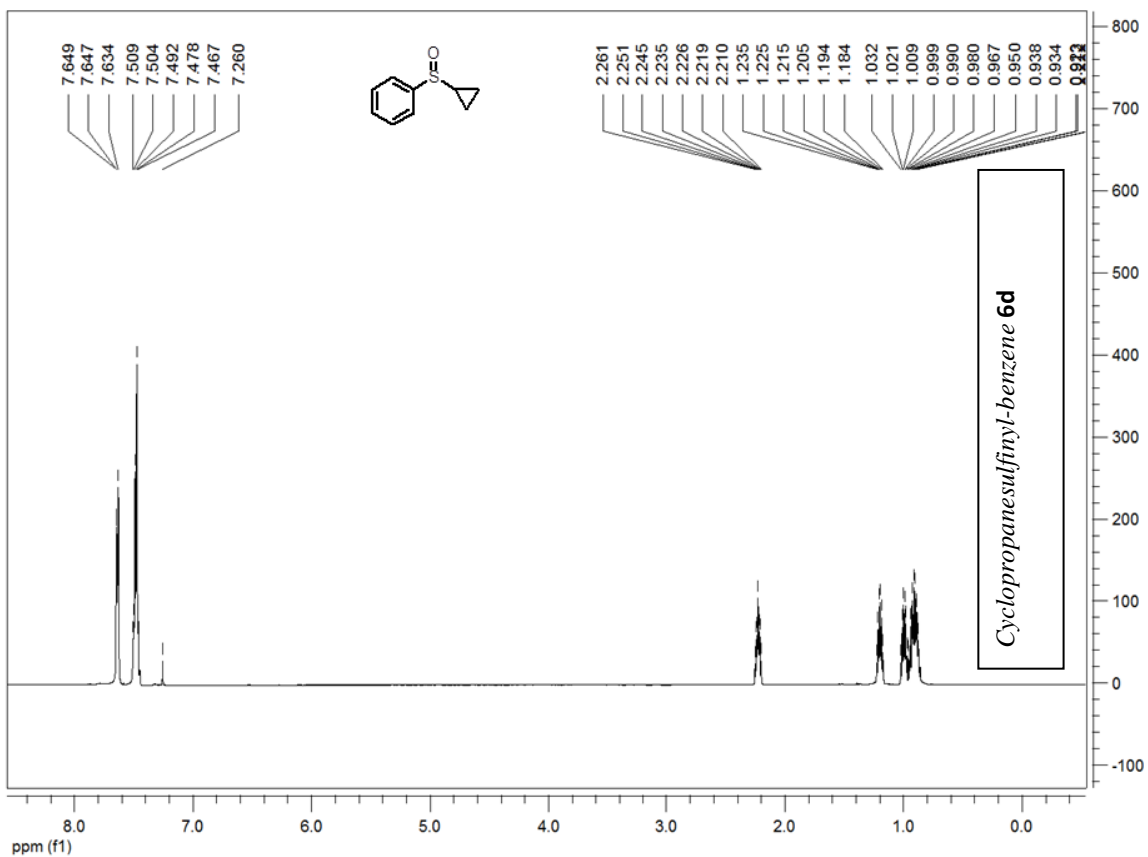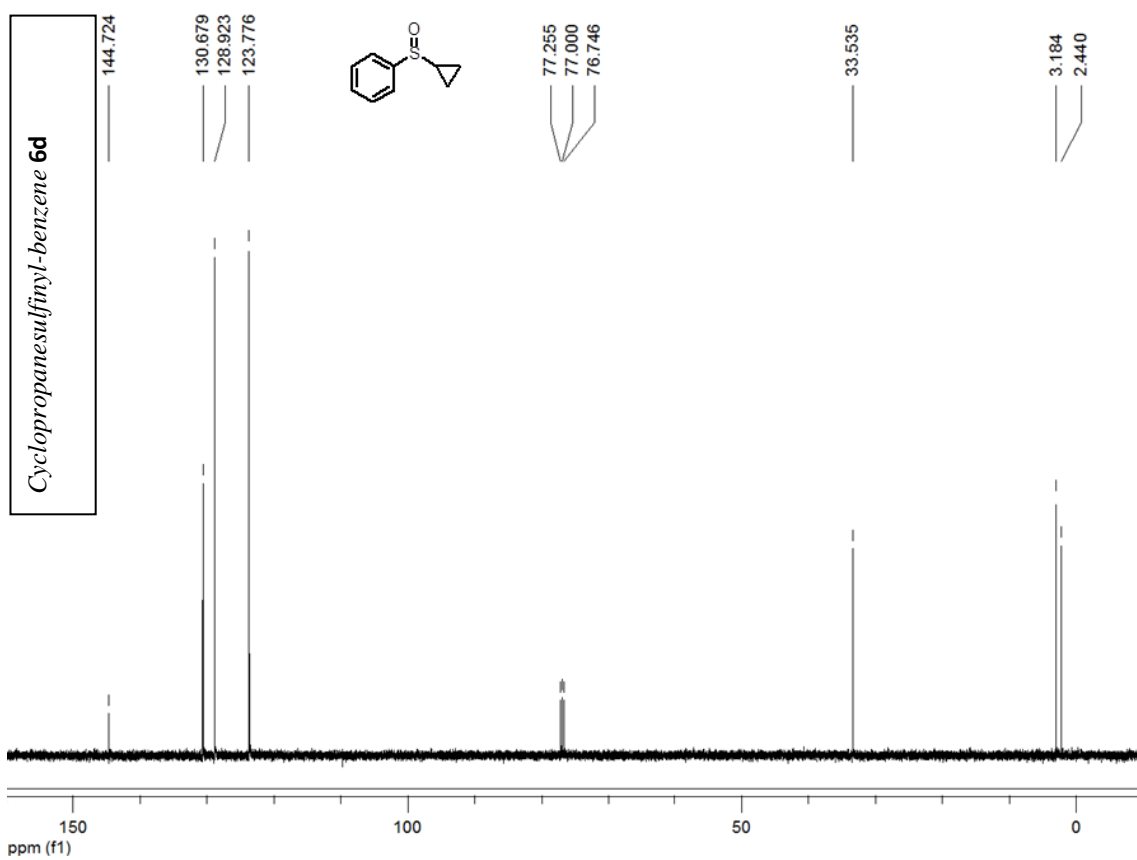

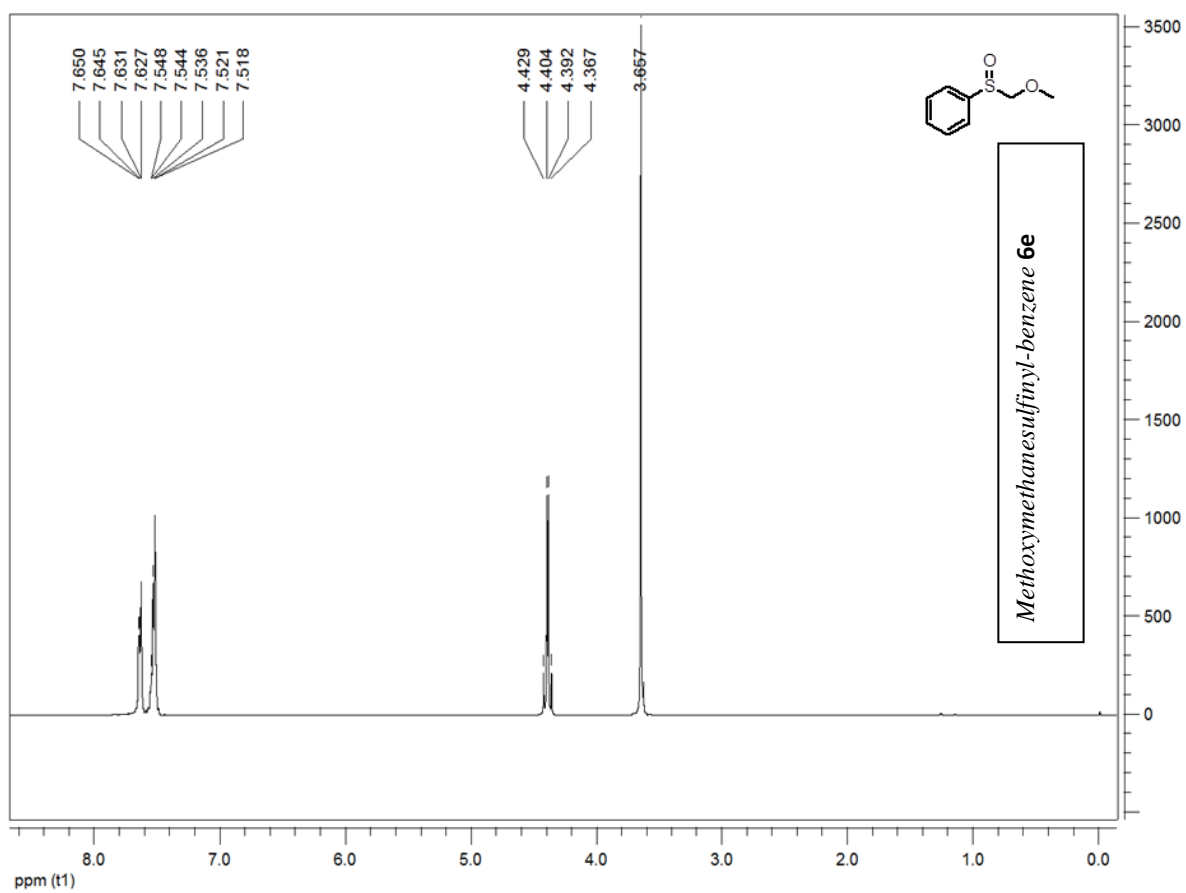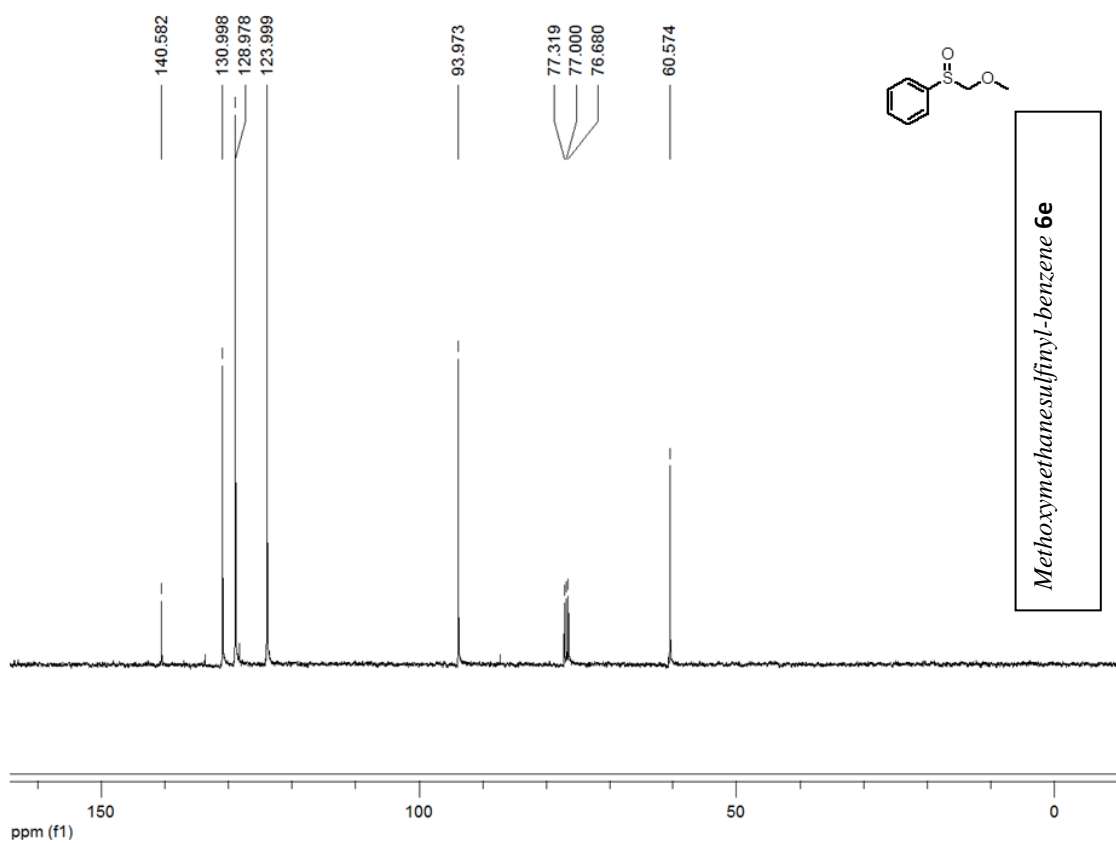

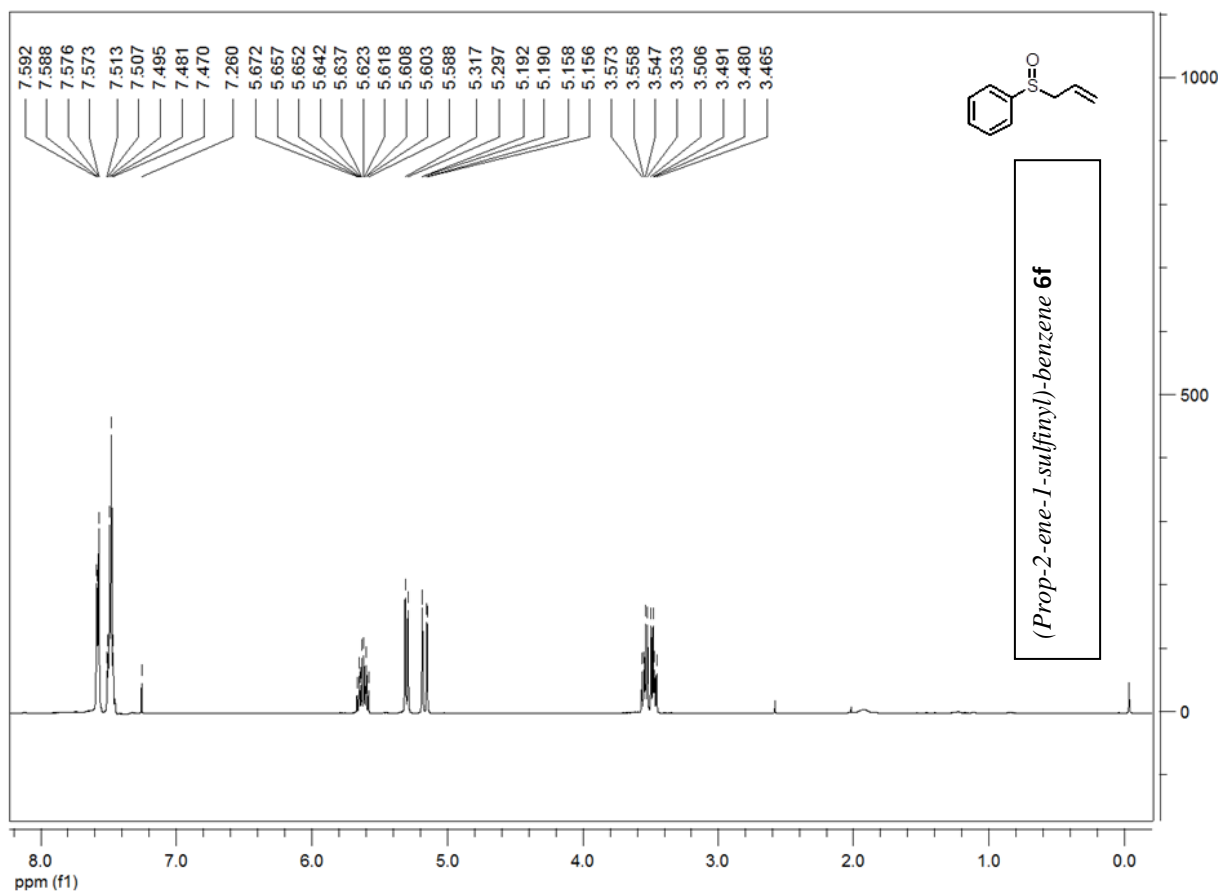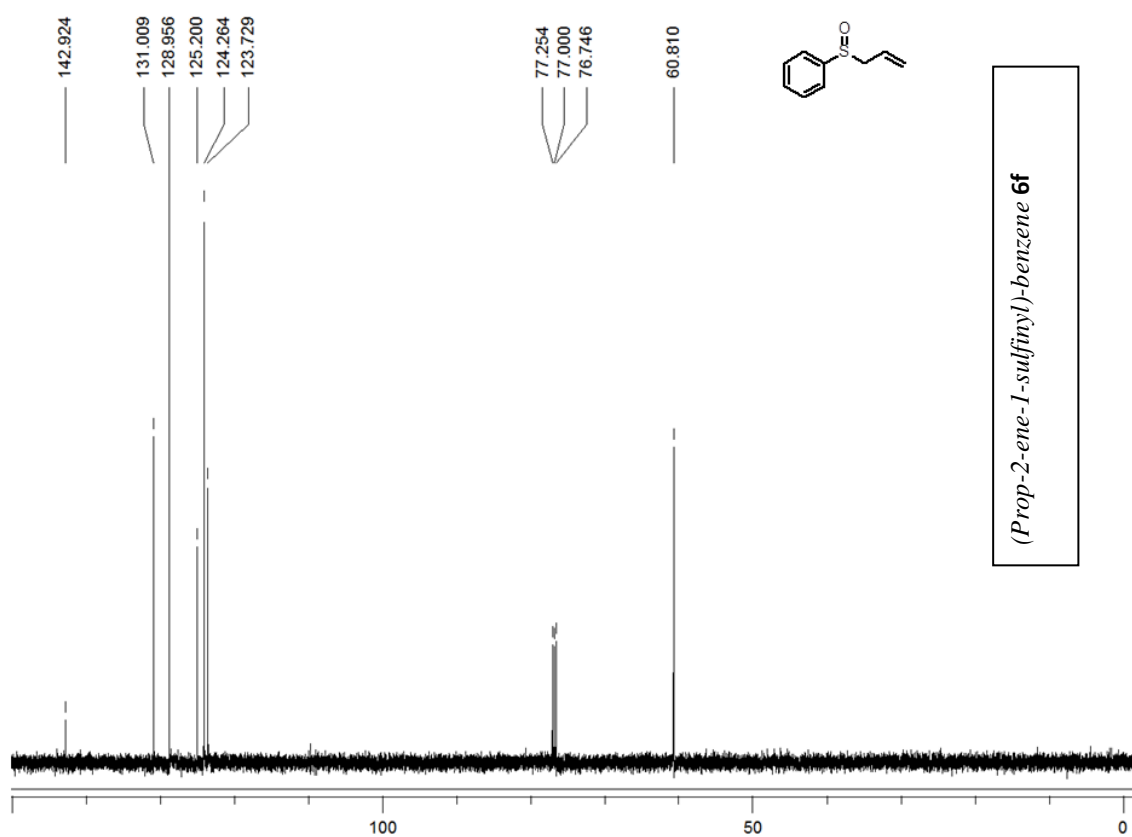

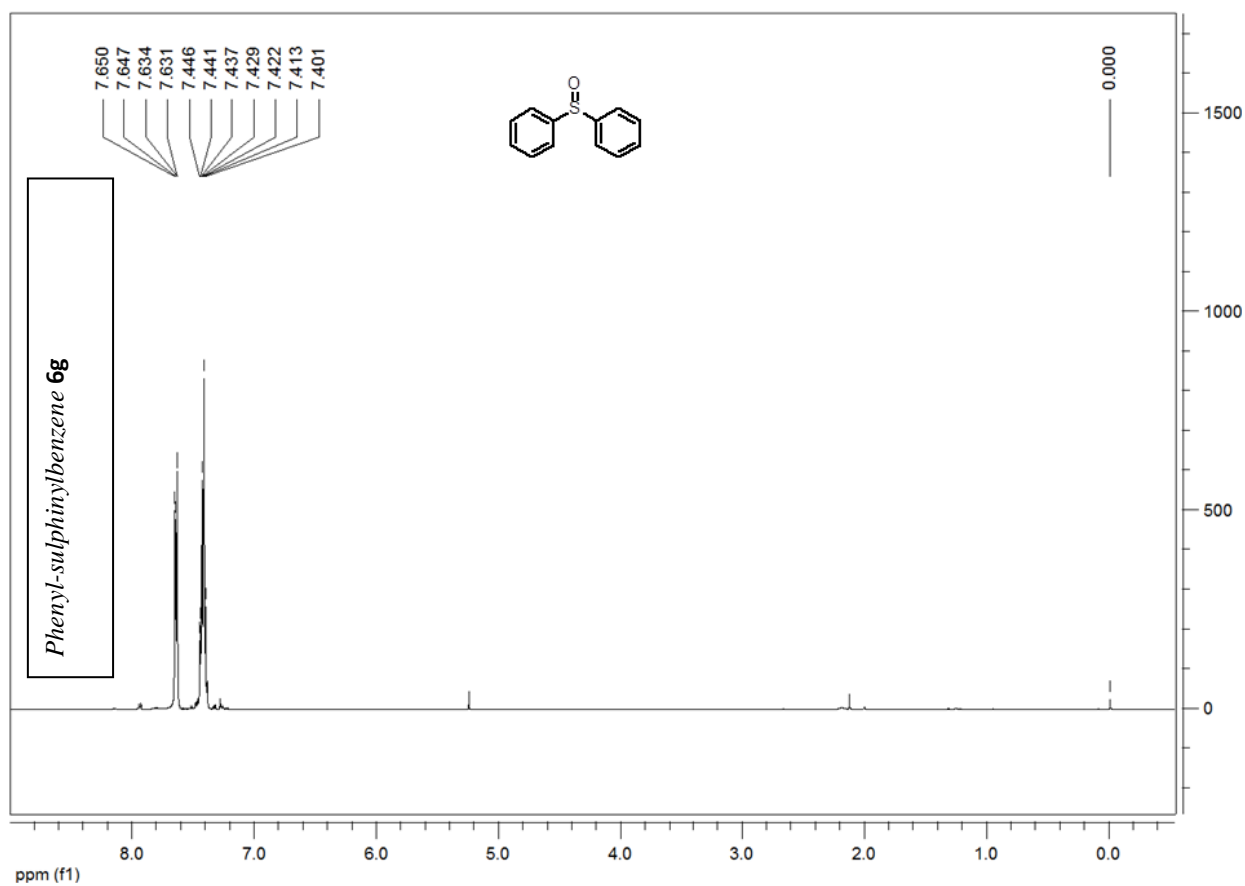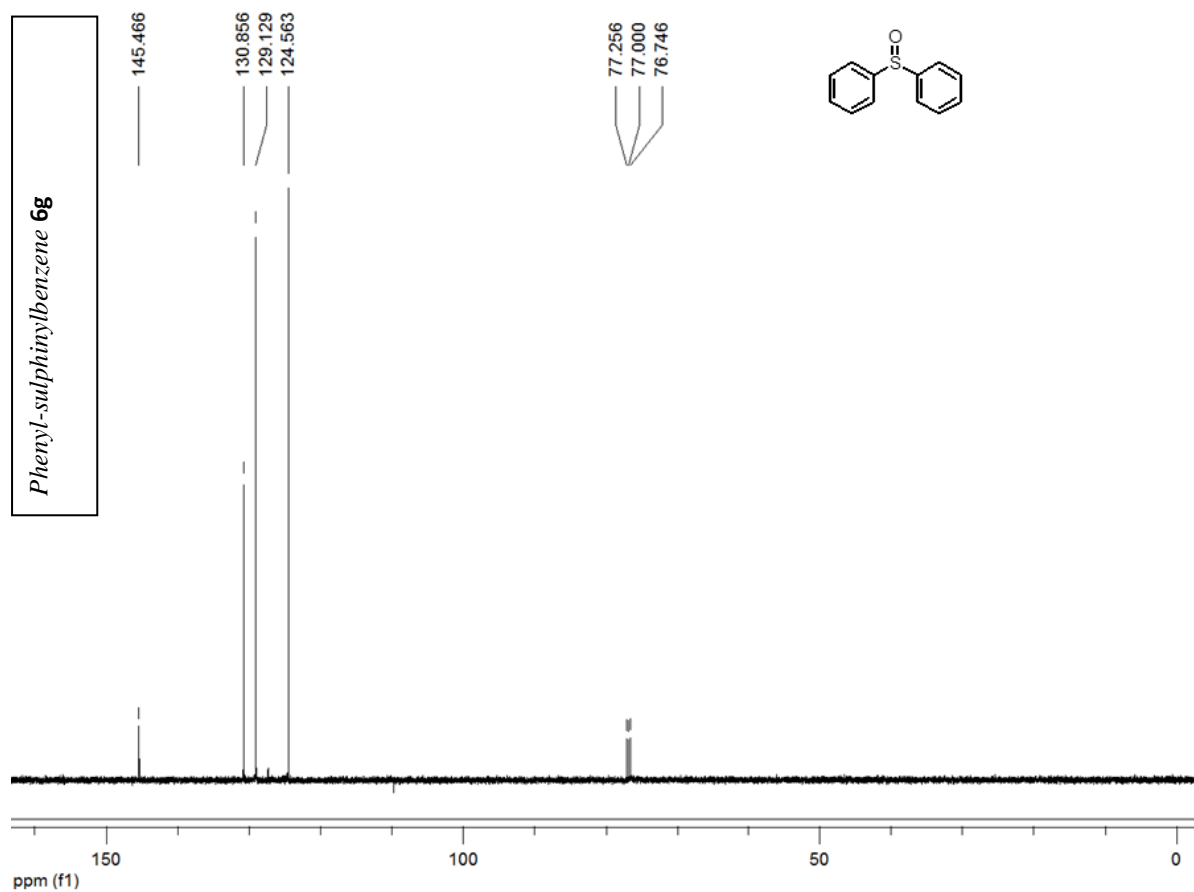

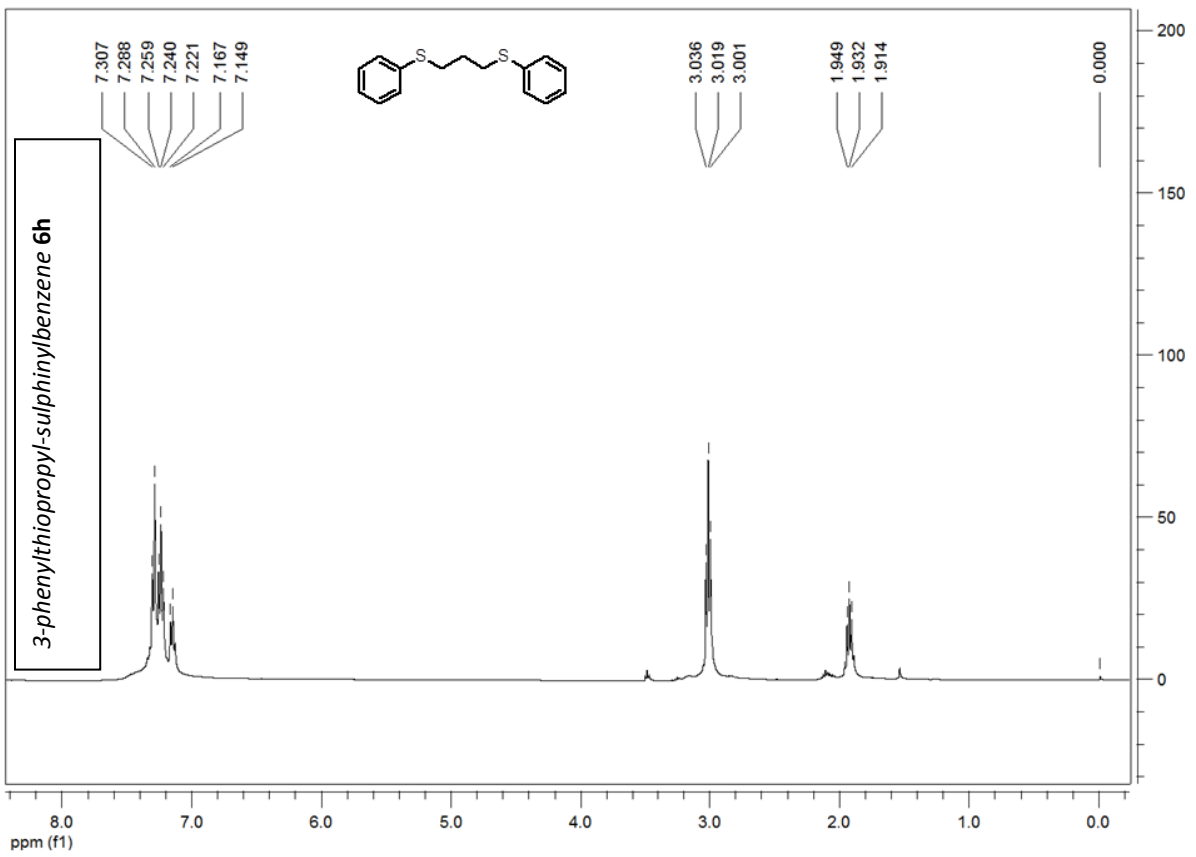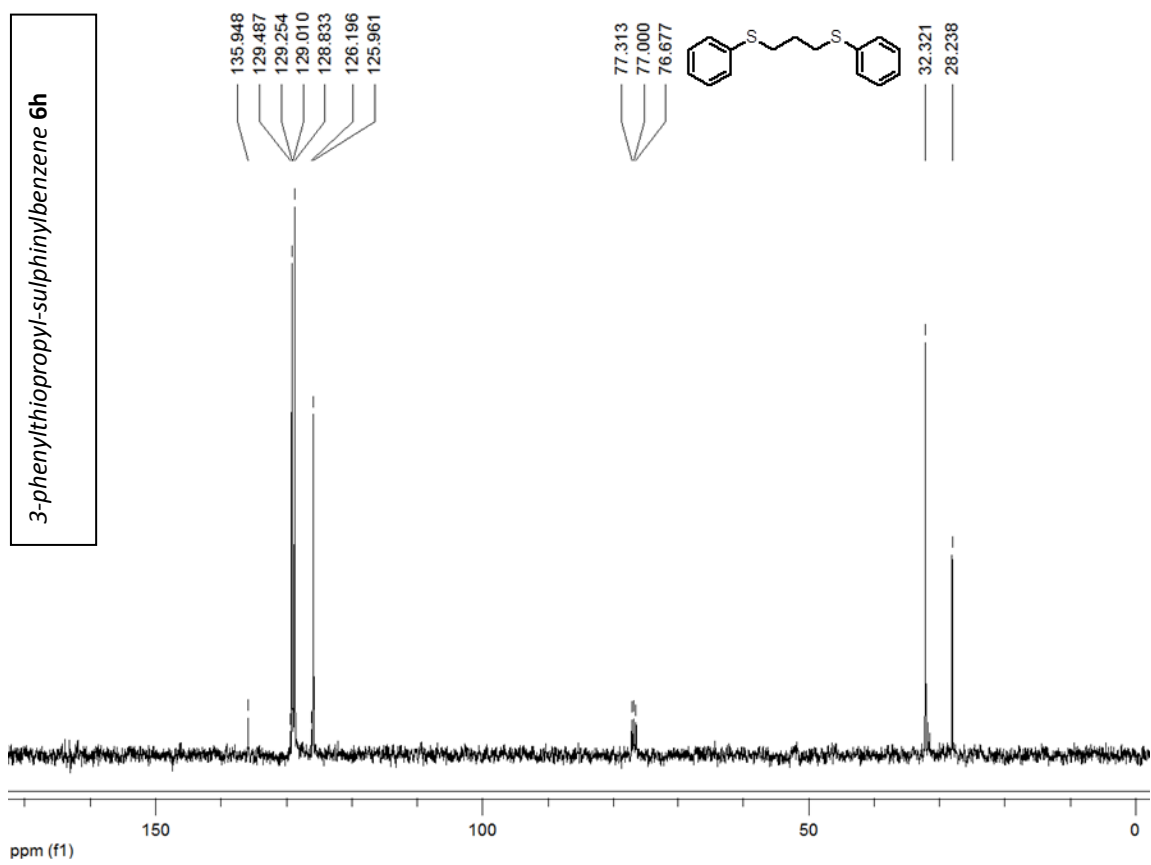

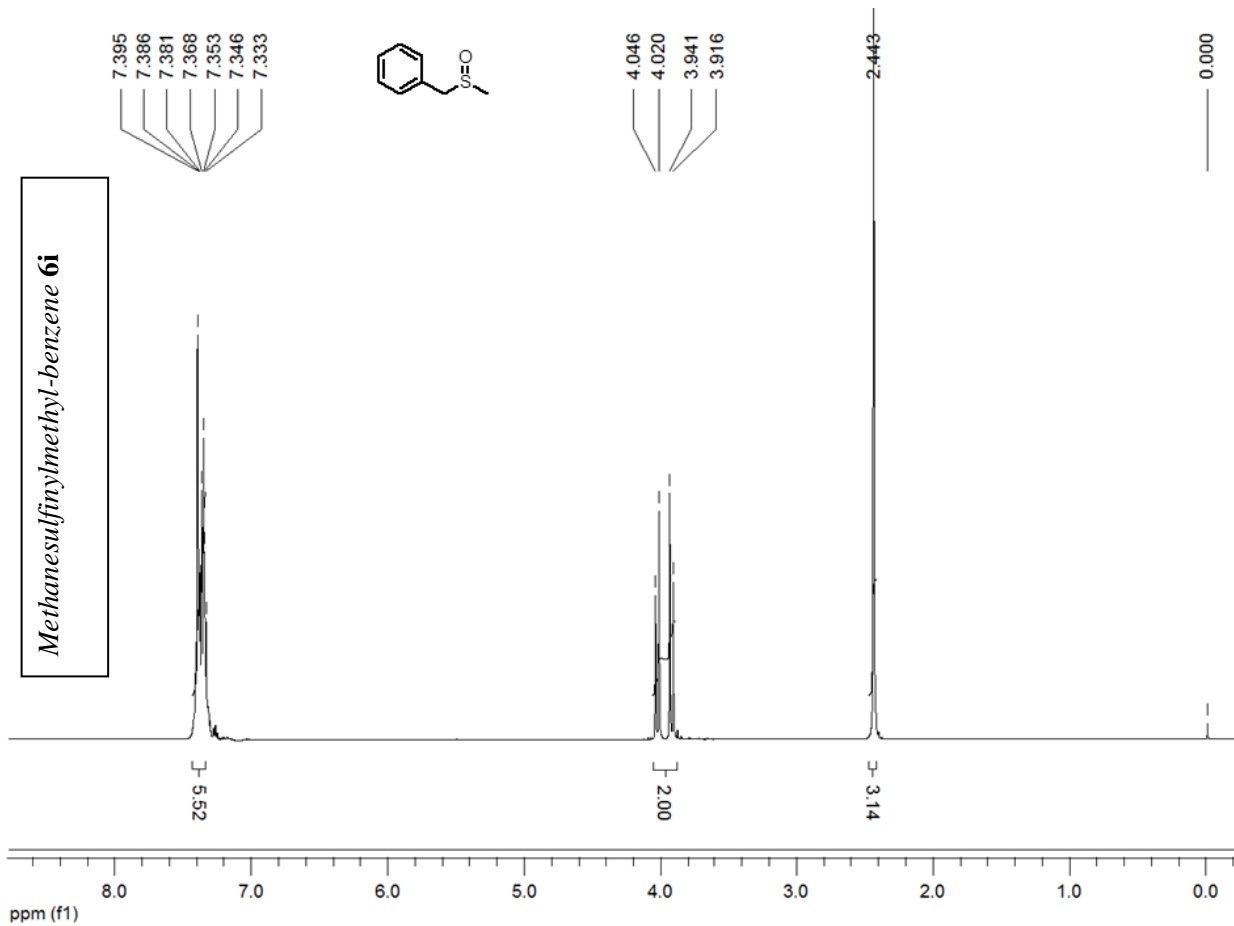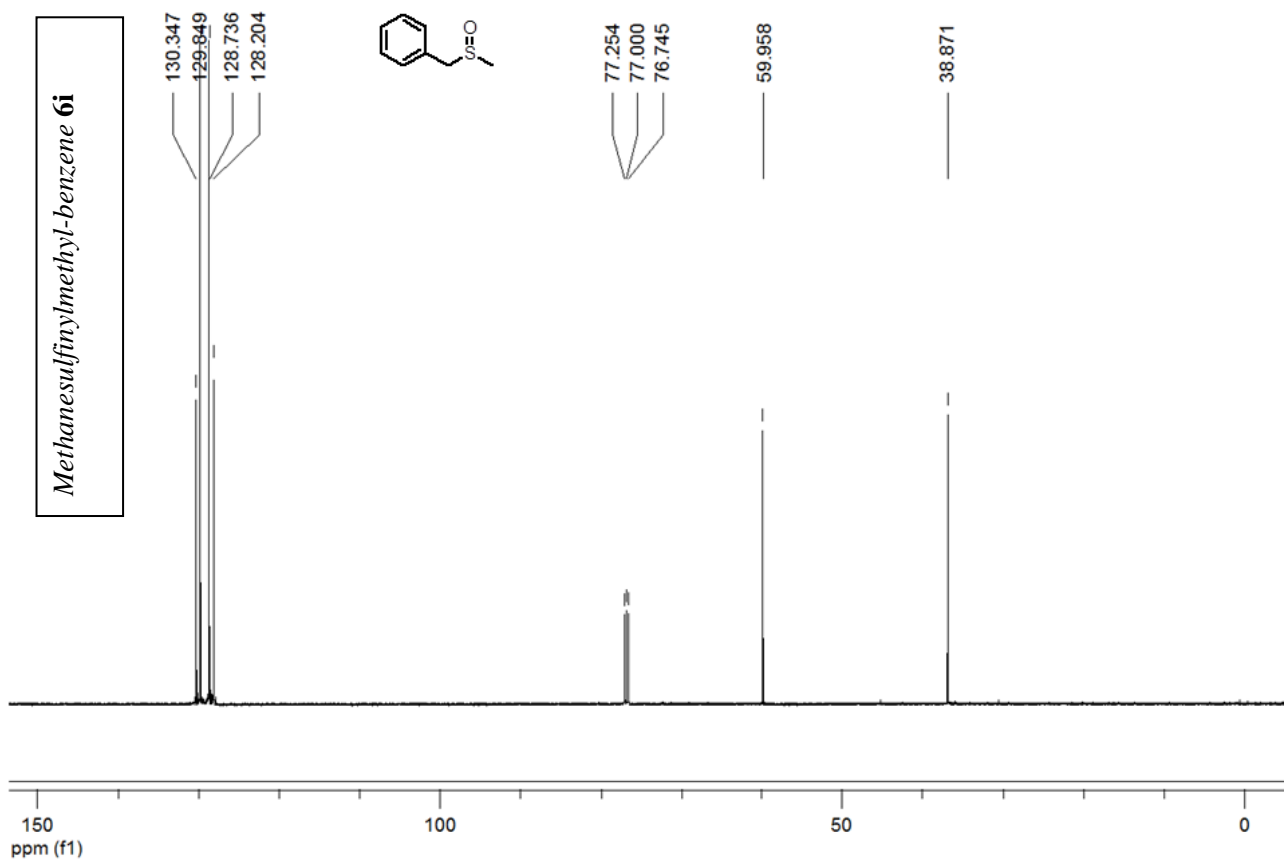

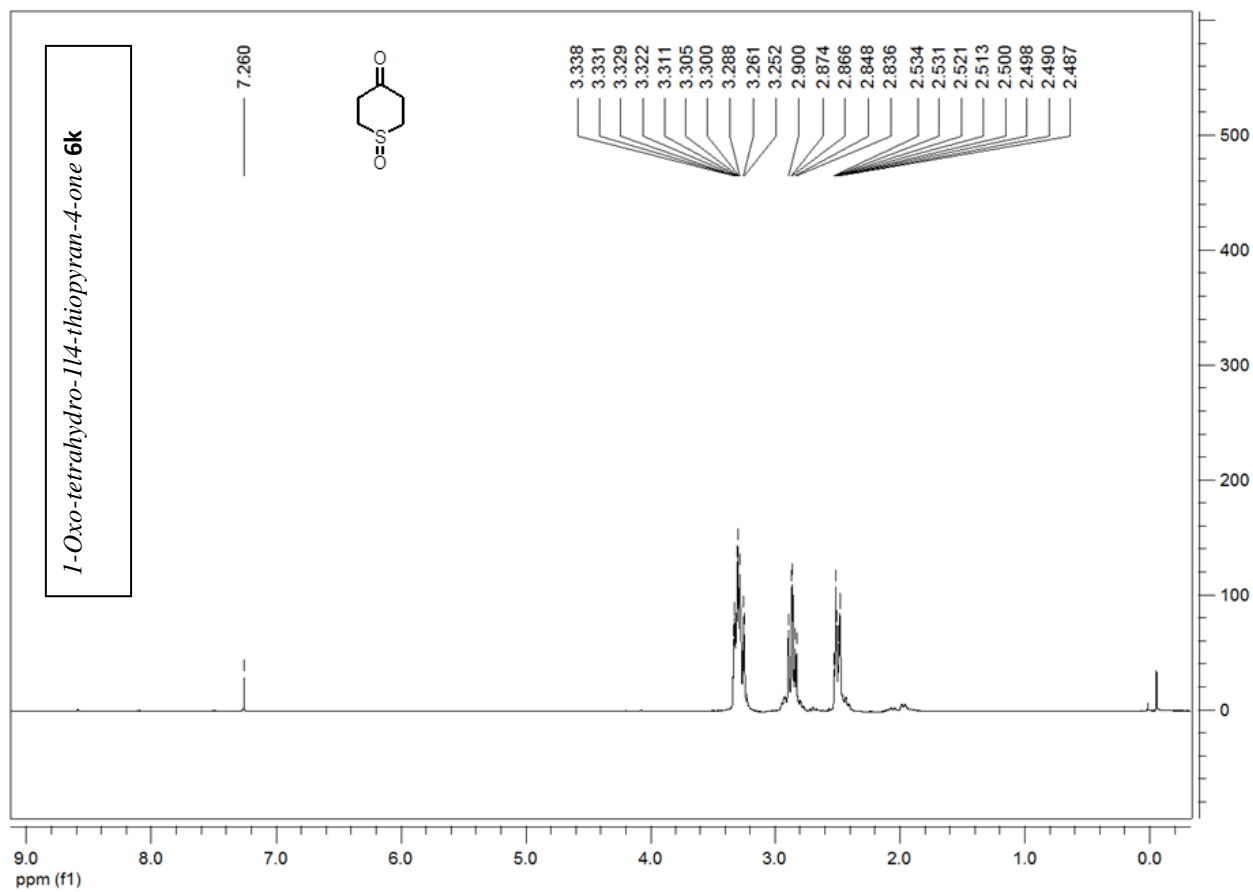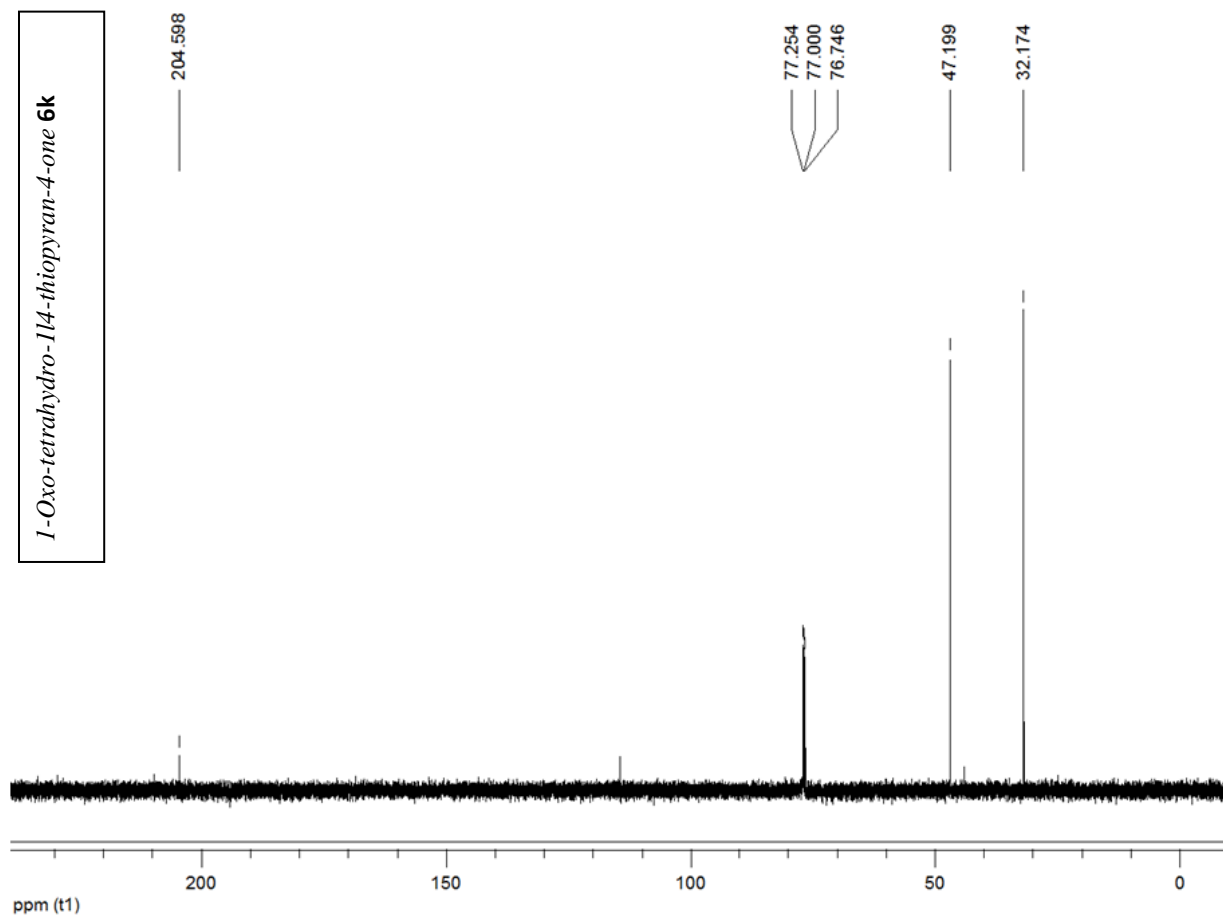



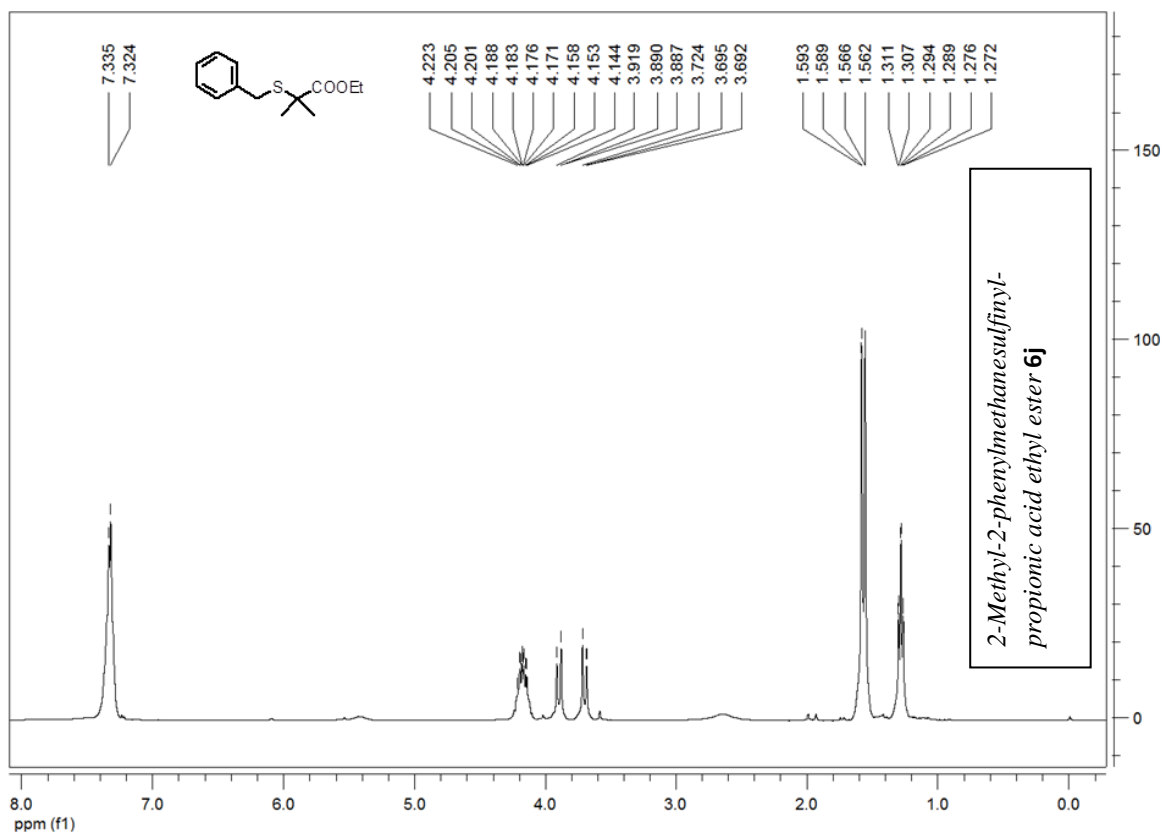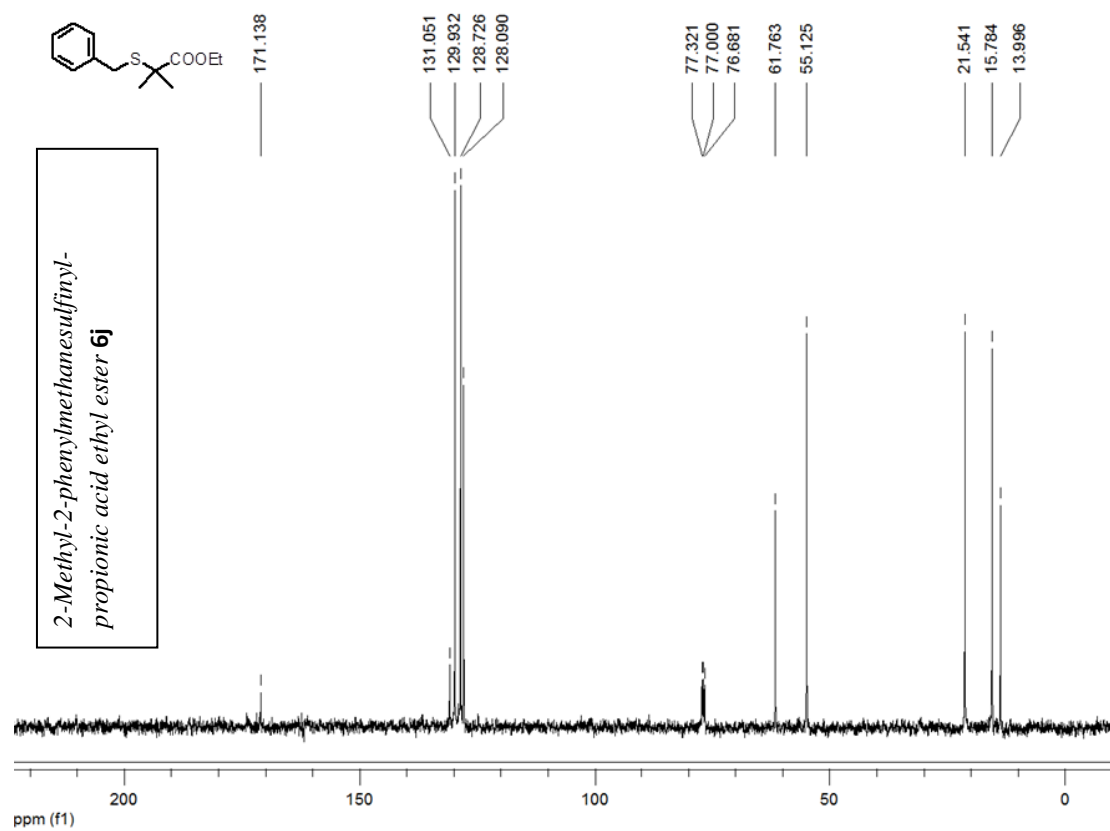

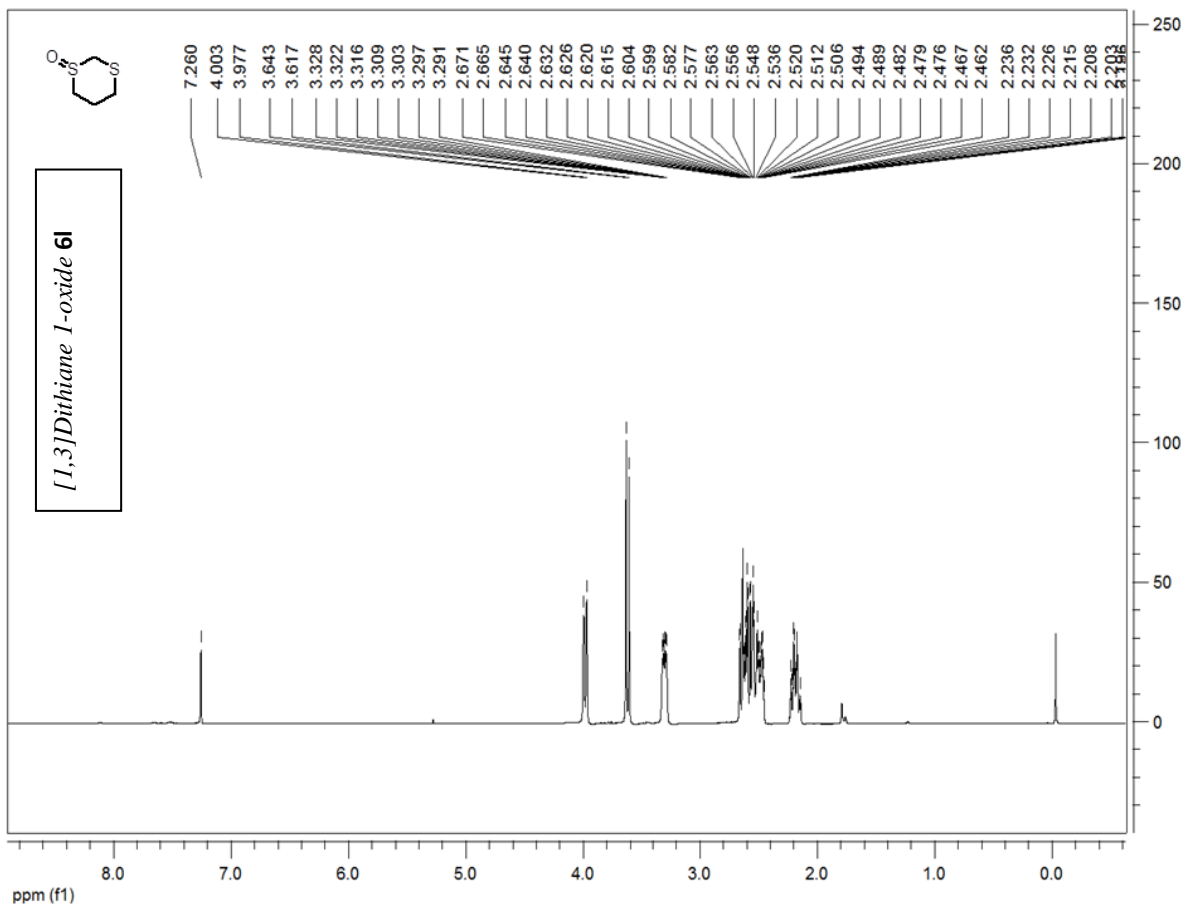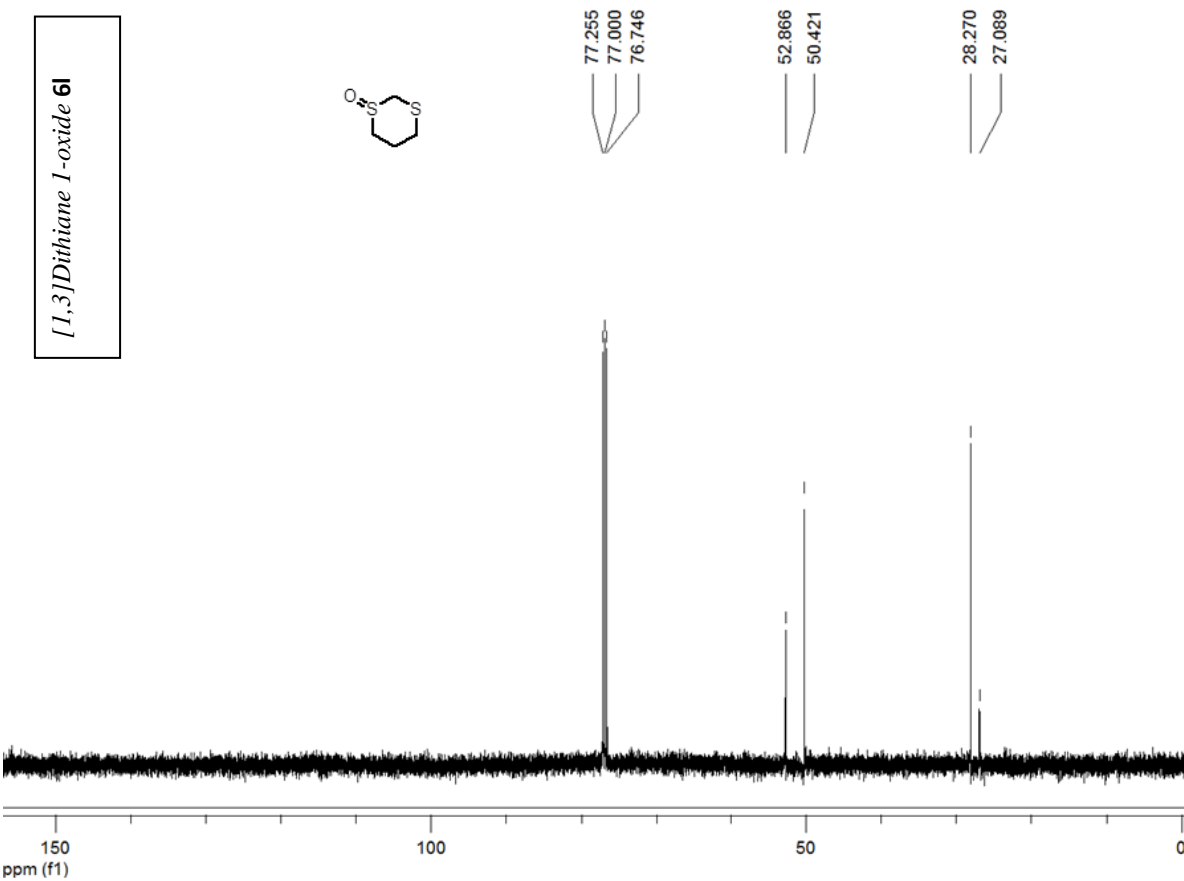

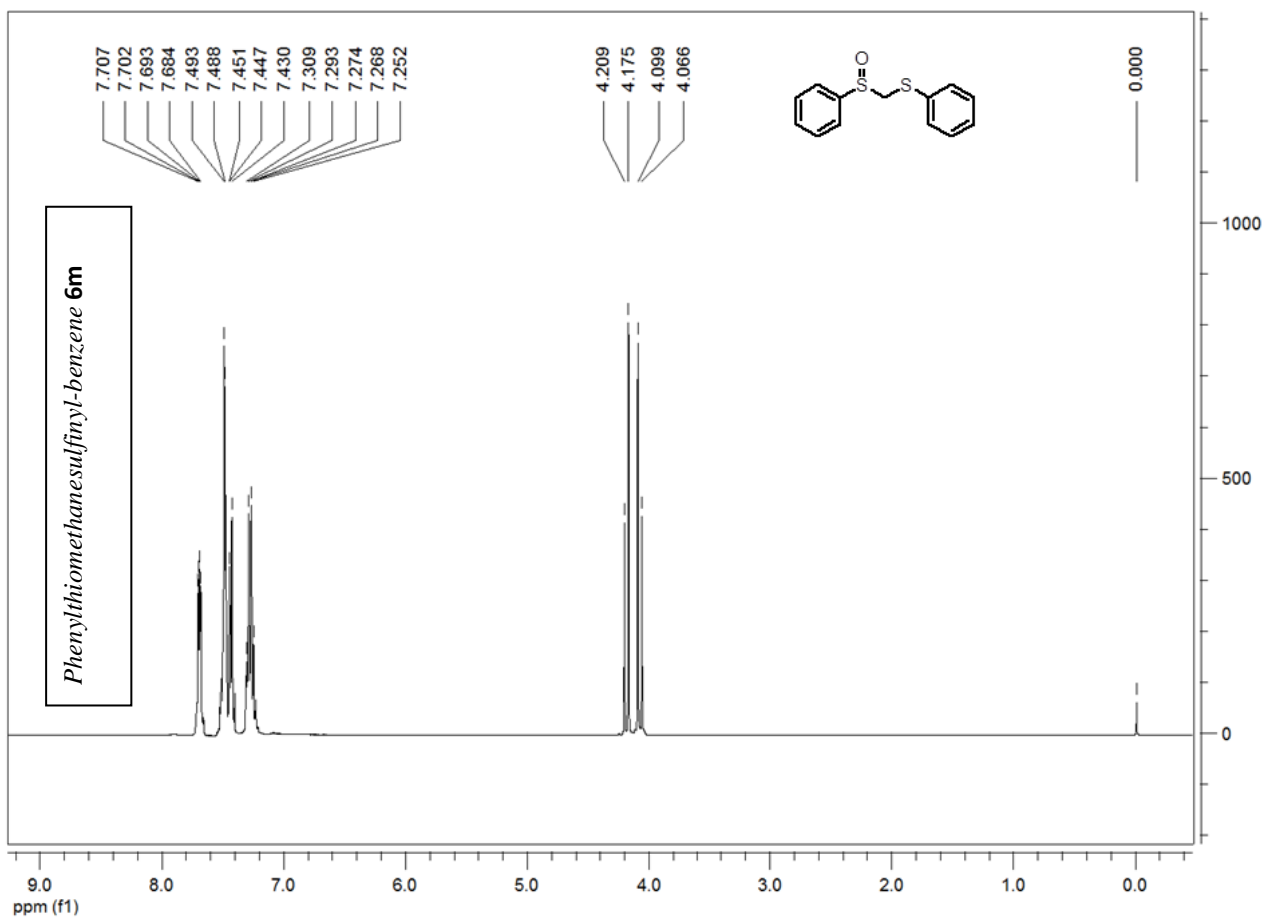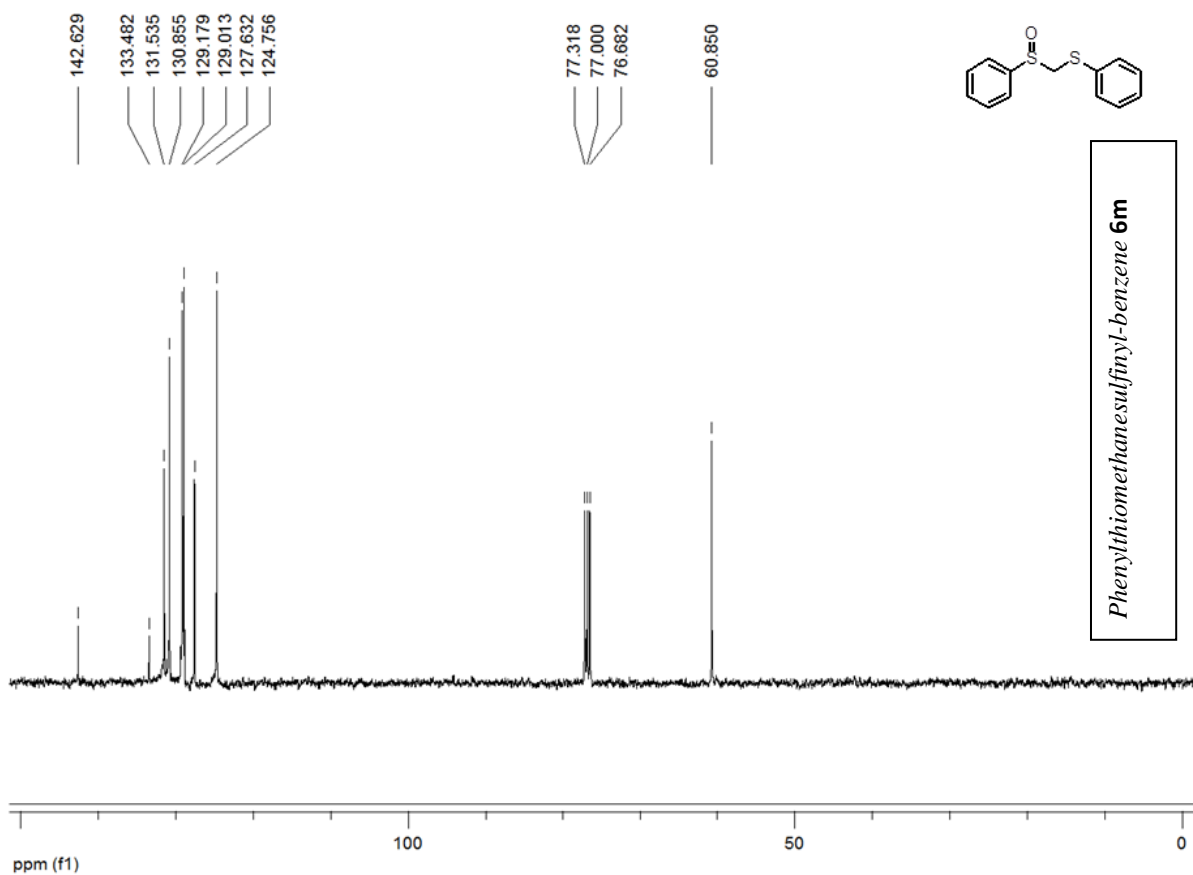

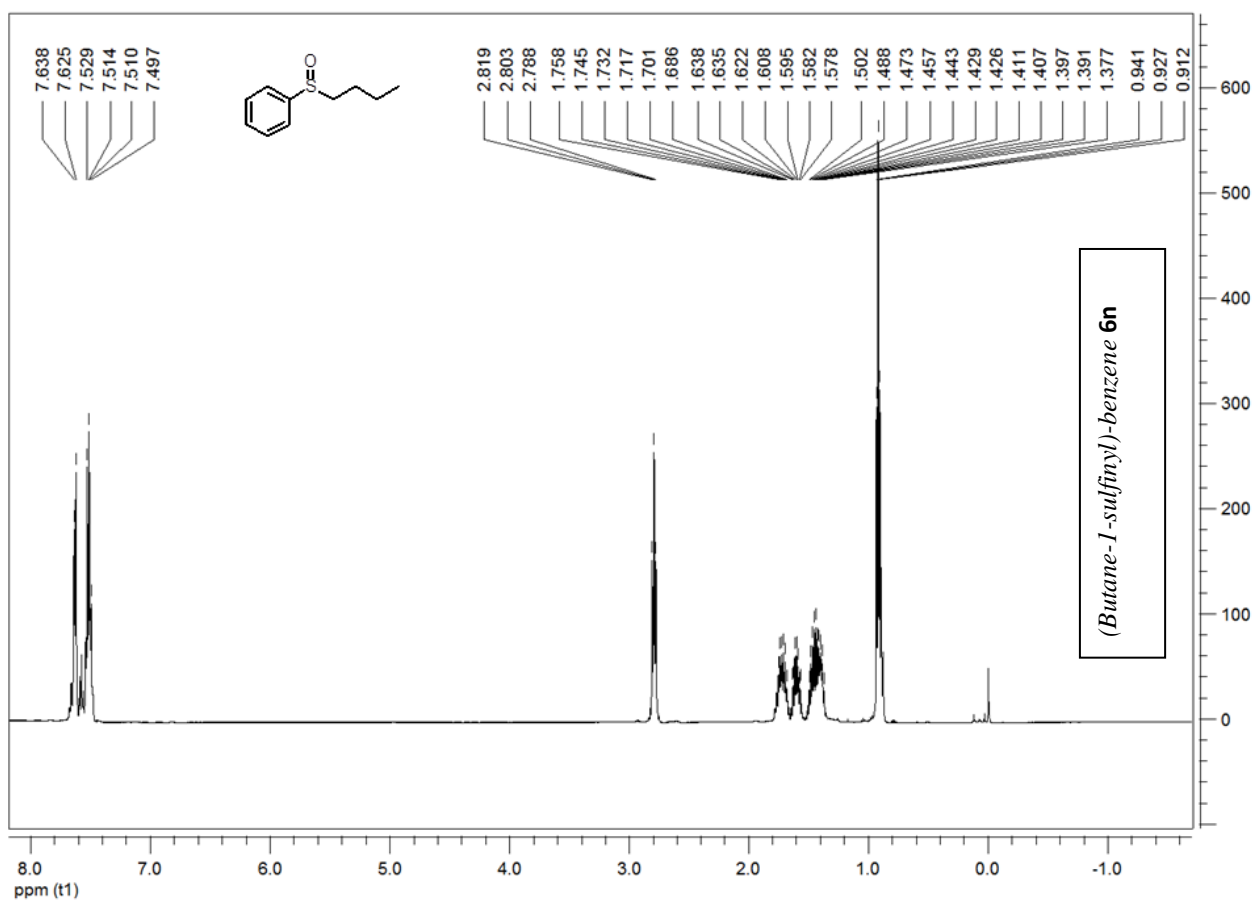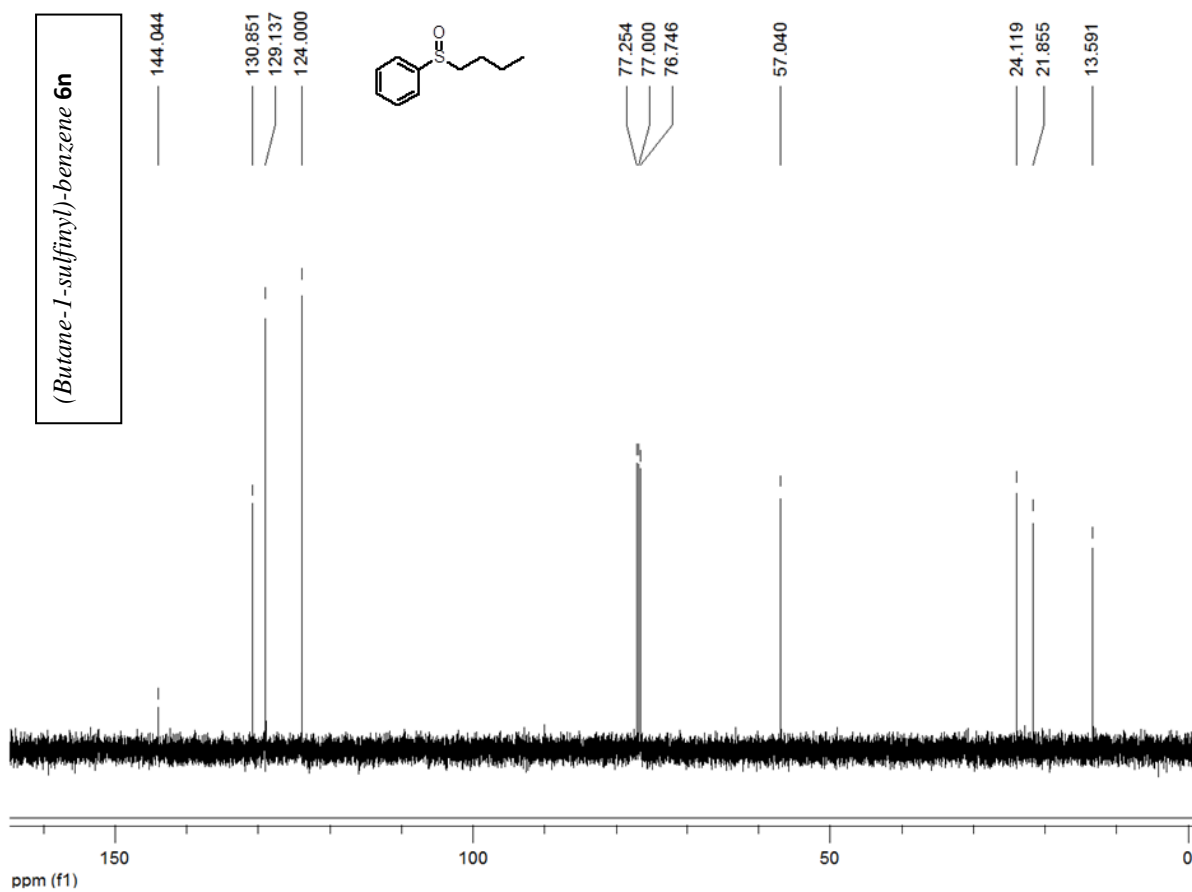

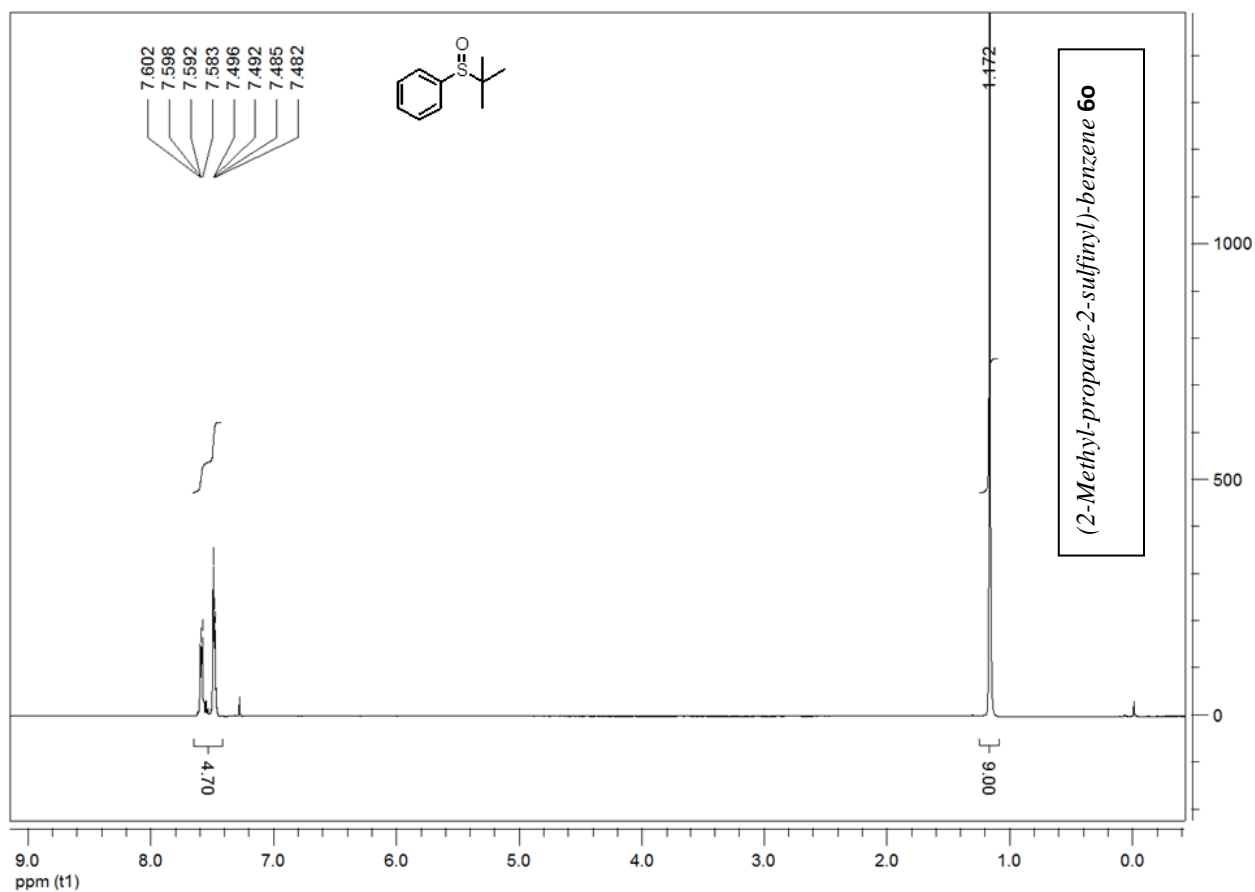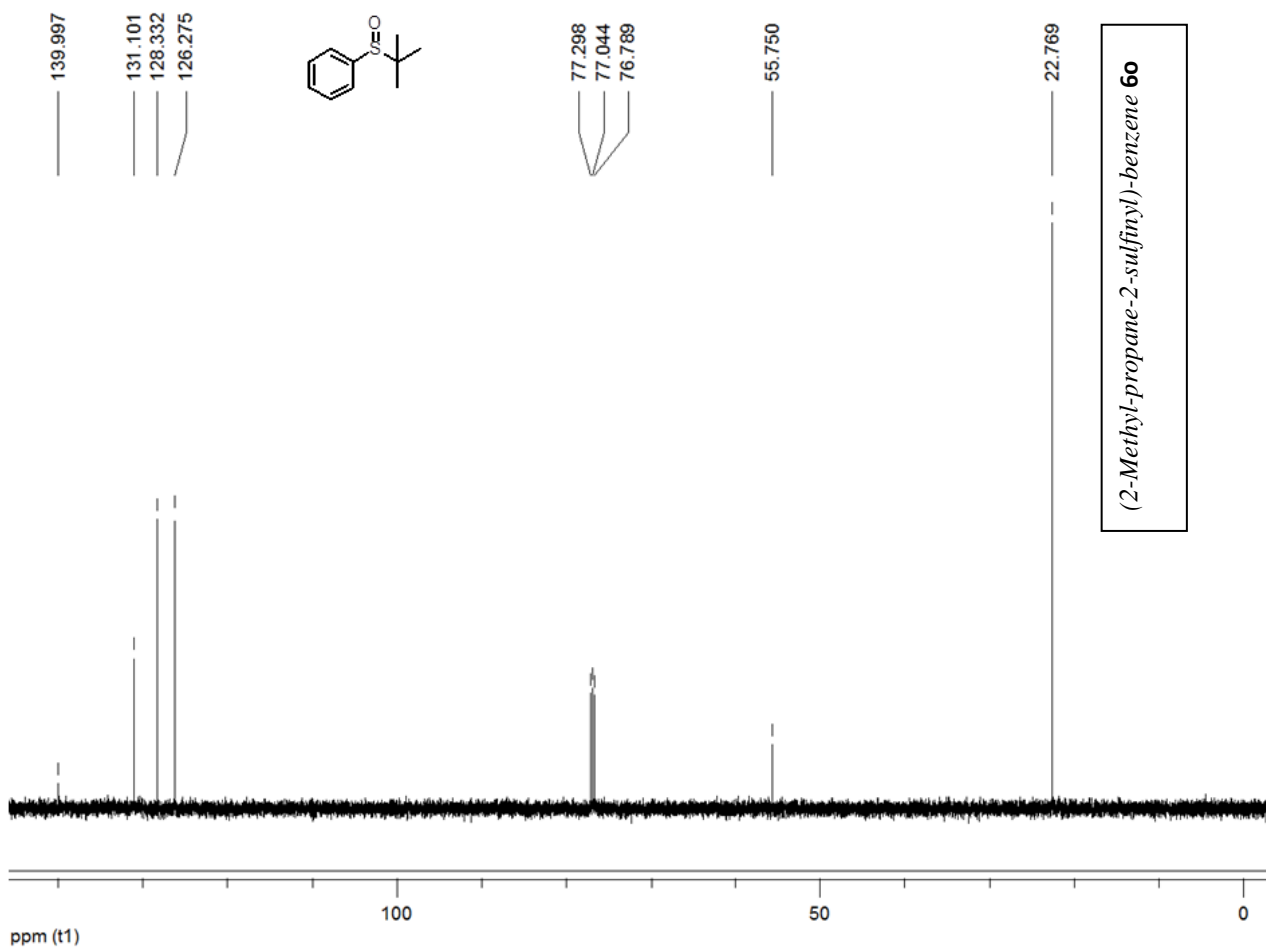

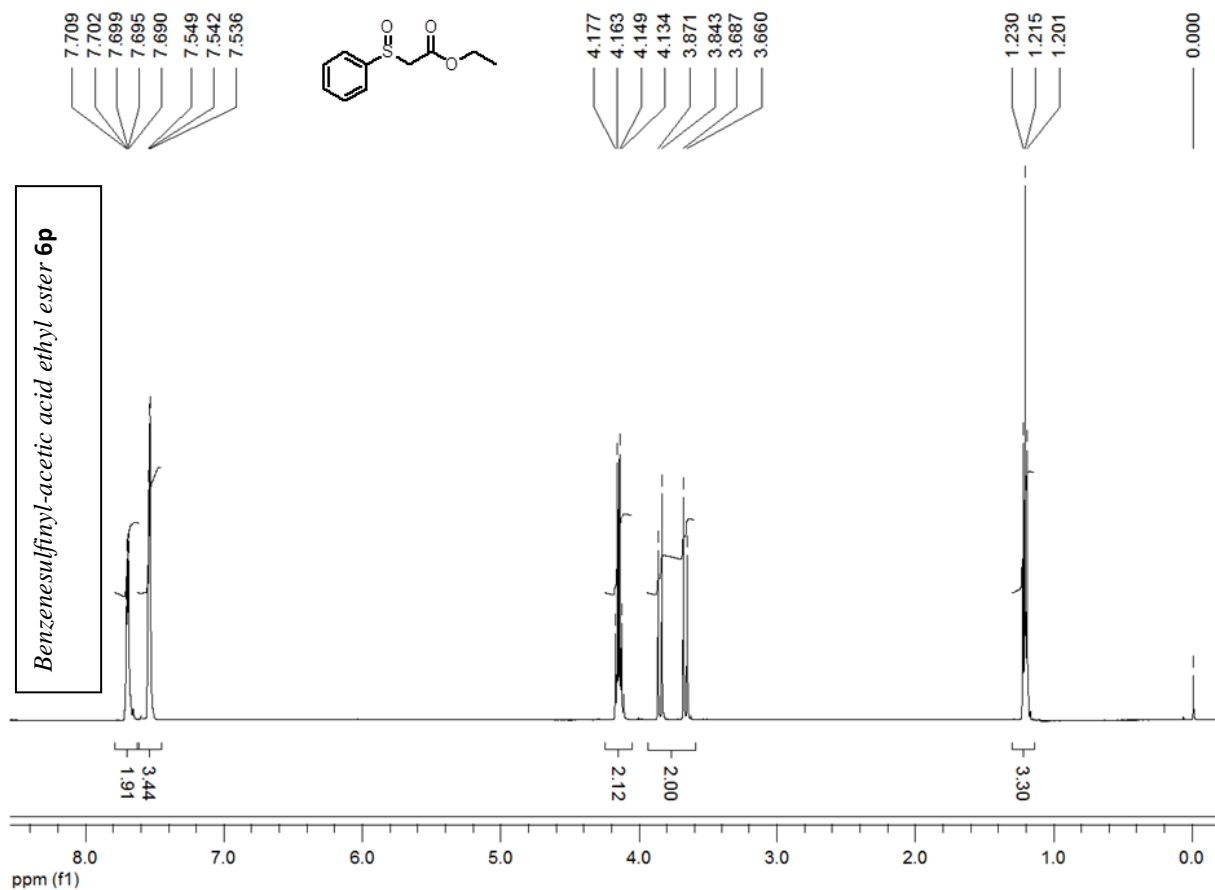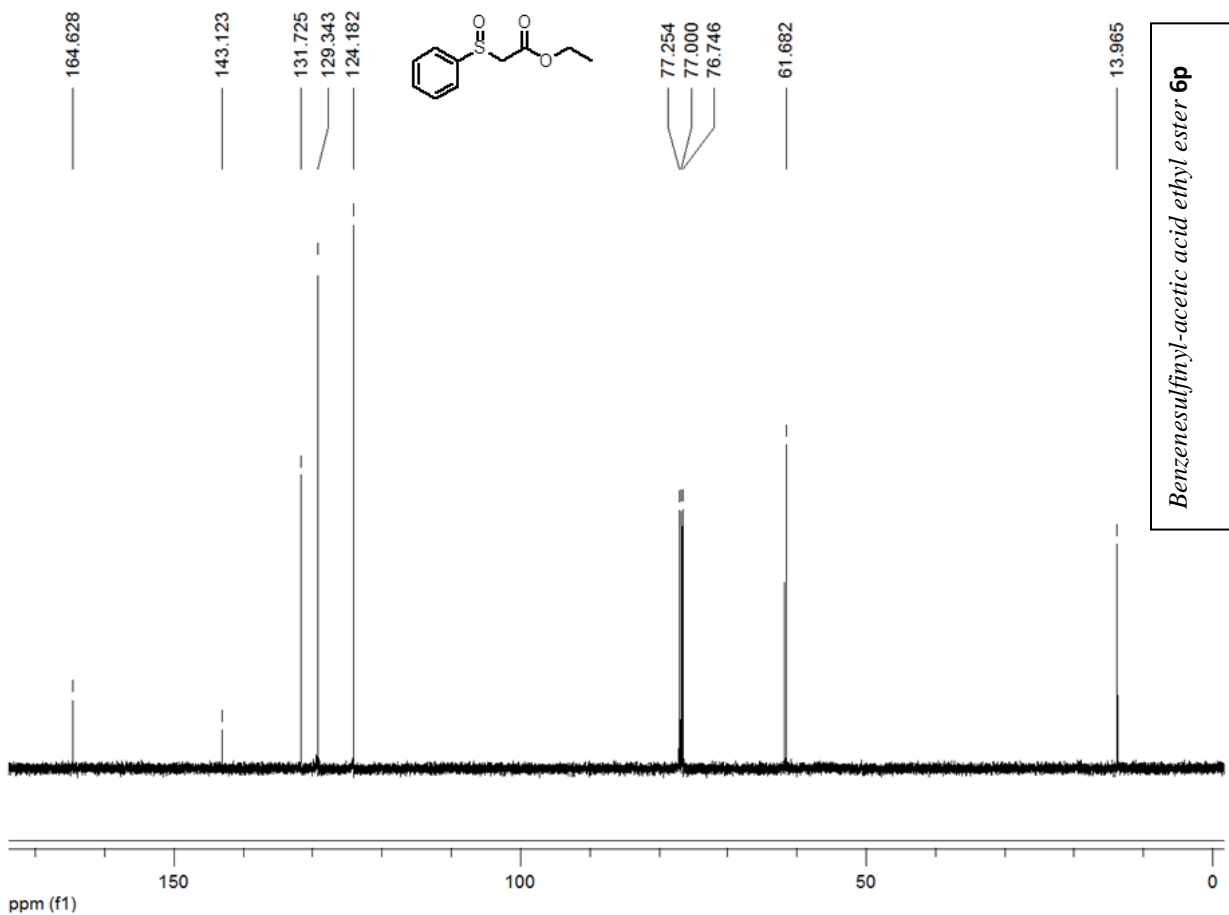

# $^1\text{H}$ and $^{13}\text{C}$ NMR spectra of catalysts 9a-c

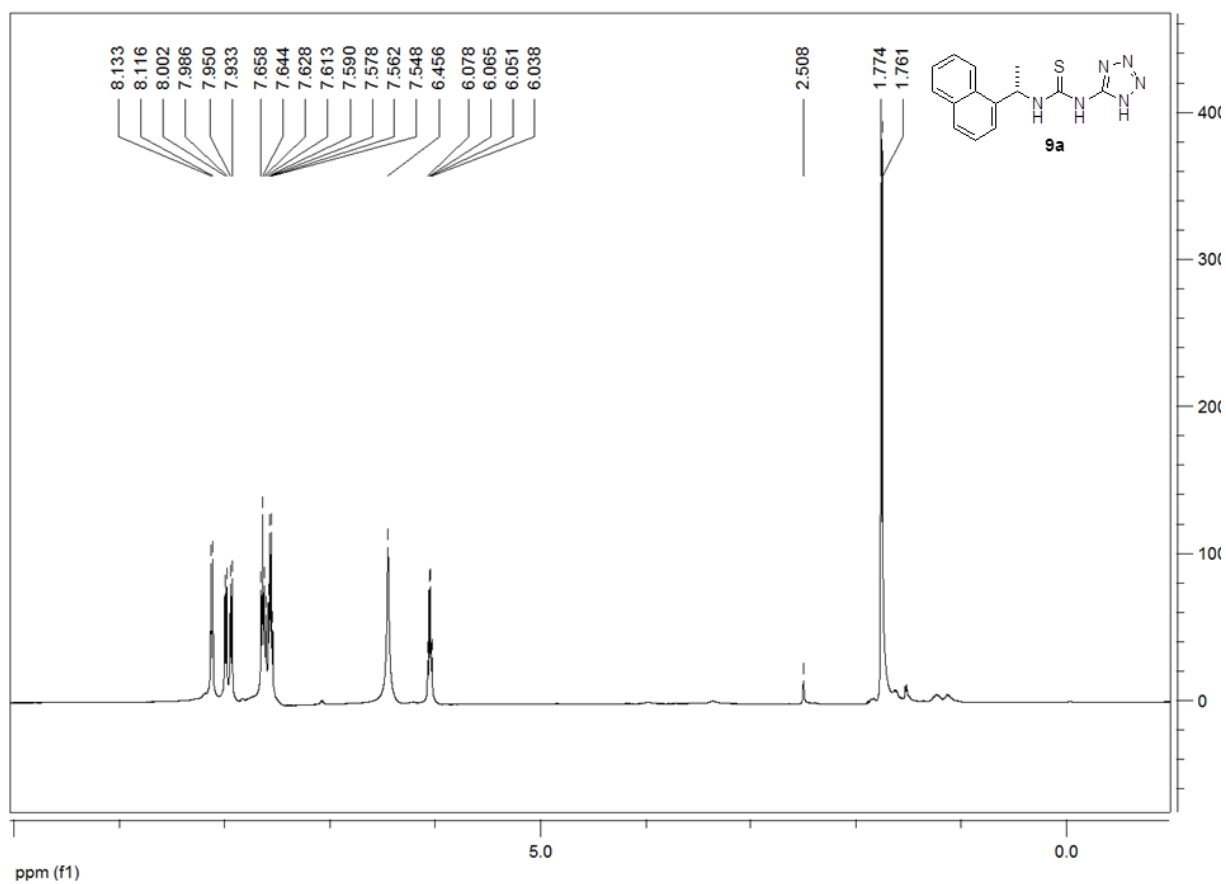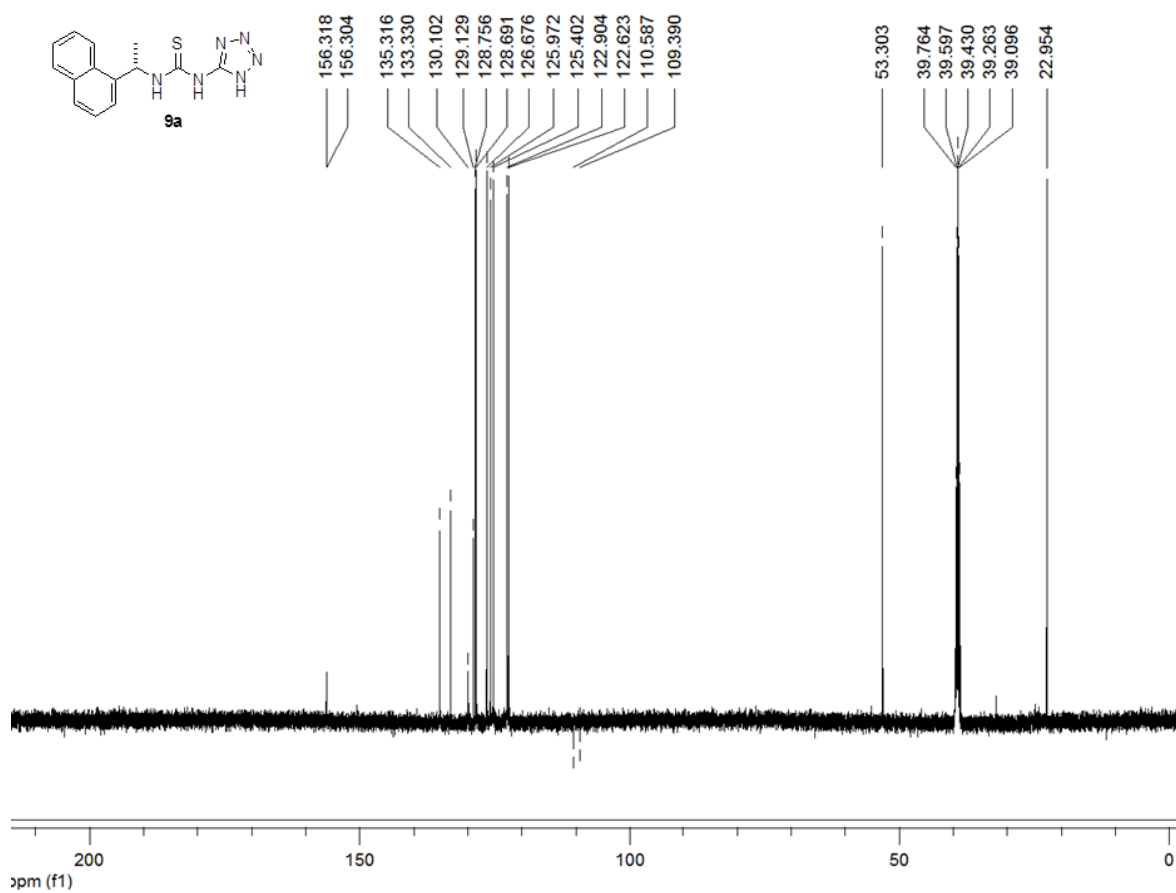

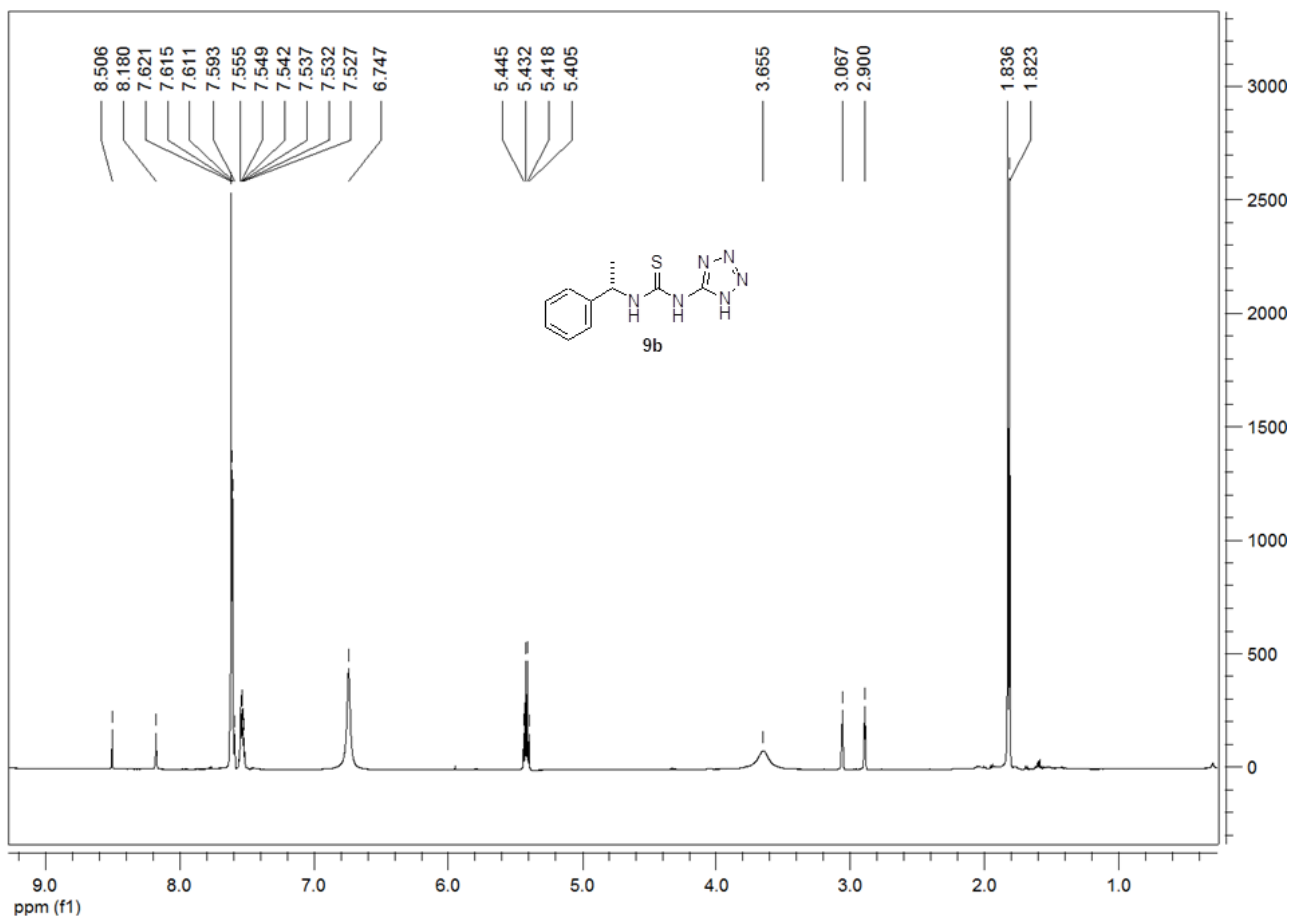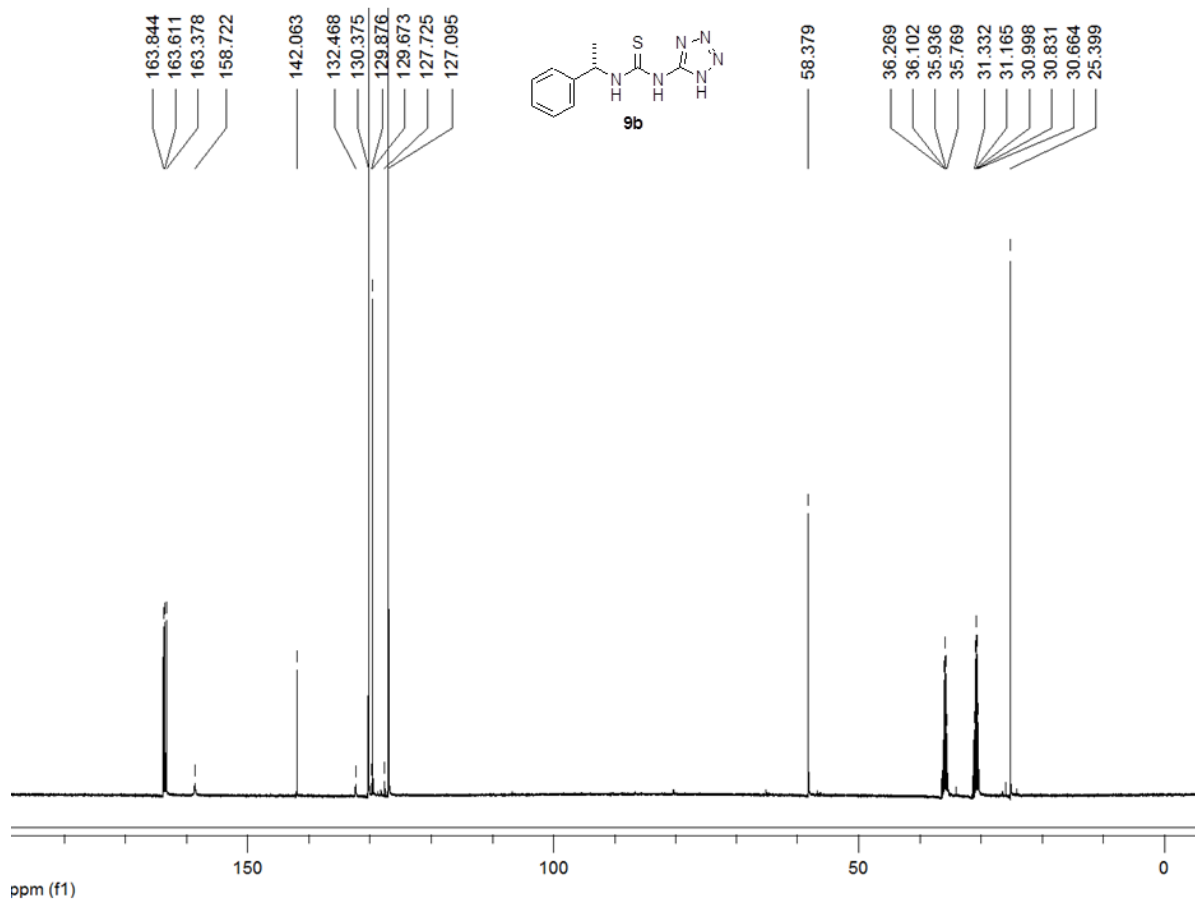



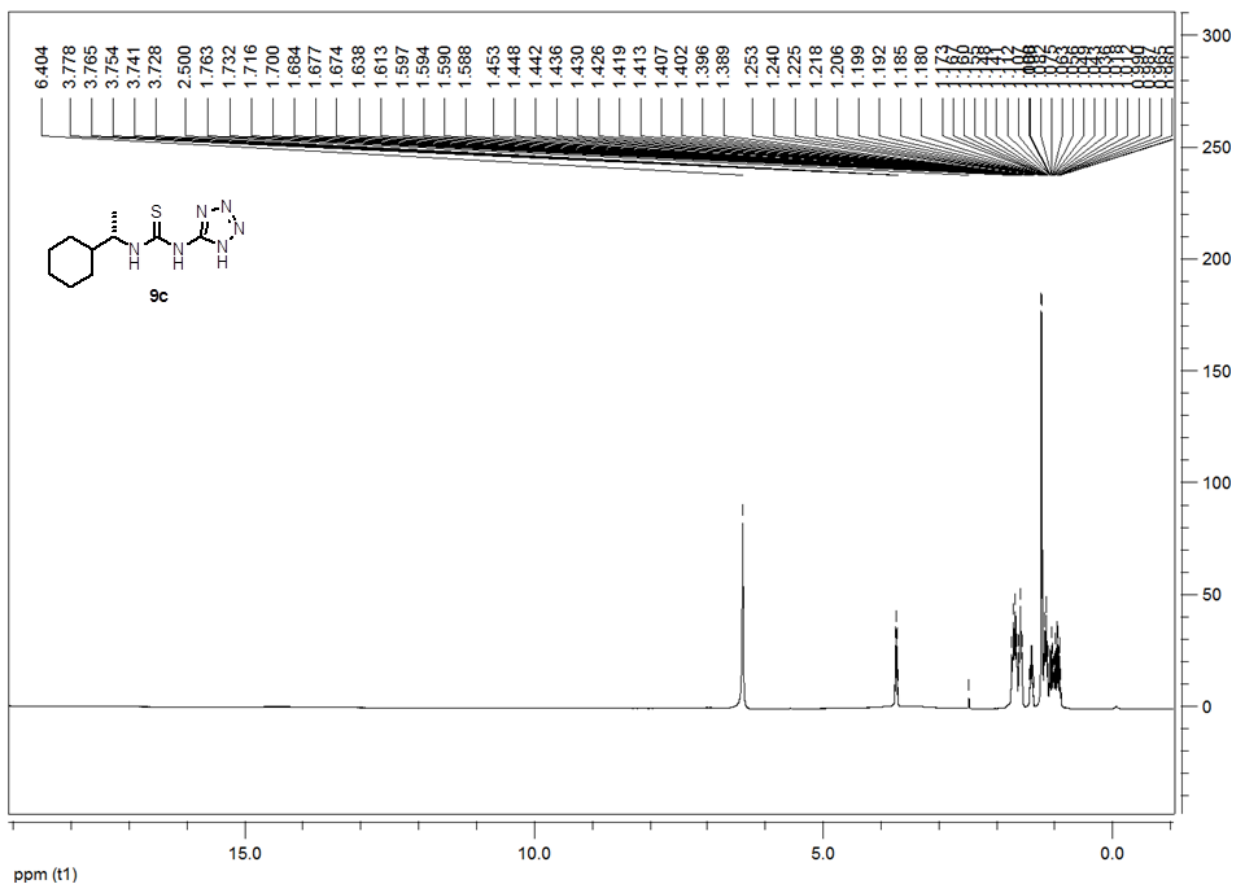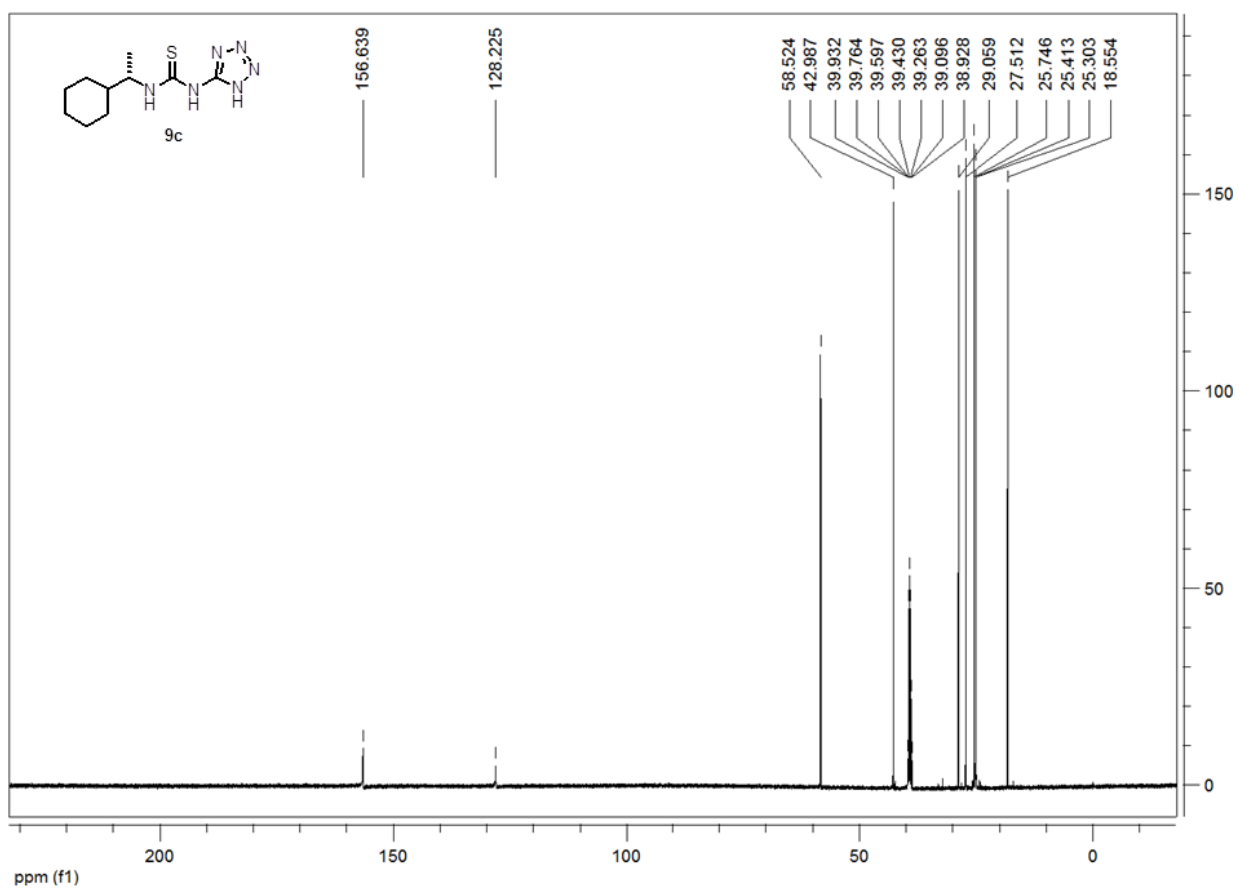

Supplement: c4nj00530a1.pdf [file c4nj00530a1.pdf]
